# Supplementary material for: Hospitalization Following Outpatient Diagnosis of Respiratory Syncytial Virus in Adults
Source: PubMed Central journal article supplement — JAMA Netw Open. 2024 Nov 19;7(11):e2446010. doi: 10.1001/jamanetworkopen.2024.46010 (PMC11577139; doi:10.1001/jamanetworkopen.2024.46010), 2024-11-19
Supplement: jamanetwopen-e2446010-s001.pdf [file jamanetwopen-e2446010-s001.pdf]

## Supplemental Online Content

Landi SN, Garofalo DC, Reimbaeva M, et al. Hospitalization following outpatient diagnosis of respiratory syncytial virus in adults. *JAMA Netw Open*. 2024;7(11):e2446010.  
doi:10.1001/jamanetworkopen.2024.46010

### **eAppendix.** Code List

This supplemental material has been provided by the authors to give readers additional information about their work.

## eAppendix. Code List

|                                              |                                                                                                                                                                                                                                                                                                                                                                                                                                                                                                                                                                                                                                                                                                                                                                                                                                                                                                                                                                                                                                                                                                                                                                                                                                                                                                                                                                                                                                                                                                                                                                                                                                            |
|----------------------------------------------|--------------------------------------------------------------------------------------------------------------------------------------------------------------------------------------------------------------------------------------------------------------------------------------------------------------------------------------------------------------------------------------------------------------------------------------------------------------------------------------------------------------------------------------------------------------------------------------------------------------------------------------------------------------------------------------------------------------------------------------------------------------------------------------------------------------------------------------------------------------------------------------------------------------------------------------------------------------------------------------------------------------------------------------------------------------------------------------------------------------------------------------------------------------------------------------------------------------------------------------------------------------------------------------------------------------------------------------------------------------------------------------------------------------------------------------------------------------------------------------------------------------------------------------------------------------------------------------------------------------------------------------------|
| Asthma                                       | ICD-10-CM: J452, J4520, J4521, J4522, J453, J4530, J4531, J4532, J45, J45.4, J45.40, J45.41, J45.42, J45.5, J45.50, J45.51, J45.52, J459, J4590, J45901, J45902, J45909, J4599, J45990, J45991, J45998, J8283                                                                                                                                                                                                                                                                                                                                                                                                                                                                                                                                                                                                                                                                                                                                                                                                                                                                                                                                                                                                                                                                                                                                                                                                                                                                                                                                                                                                                              |
| Chronic obstructive pulmonary disease (COPD) | ICD-10-CM: J41.1, J41.8, J42, J43, J43.0, J43.1, J43.2, J43.8, J43.9, J44, J44.0, J44.1, J44.9, J47.0, J47.1, J47.9, J98.2, J98.3                                                                                                                                                                                                                                                                                                                                                                                                                                                                                                                                                                                                                                                                                                                                                                                                                                                                                                                                                                                                                                                                                                                                                                                                                                                                                                                                                                                                                                                                                                          |
| Cystic fibrosis                              | ICD-10-CM: E84, E84.0, E841, E8411, E8419, E848, E849                                                                                                                                                                                                                                                                                                                                                                                                                                                                                                                                                                                                                                                                                                                                                                                                                                                                                                                                                                                                                                                                                                                                                                                                                                                                                                                                                                                                                                                                                                                                                                                      |
| Pulmonary fibrosis                           | ICD-10-CM: J84.10, J84.112, J84.170, J84.178                                                                                                                                                                                                                                                                                                                                                                                                                                                                                                                                                                                                                                                                                                                                                                                                                                                                                                                                                                                                                                                                                                                                                                                                                                                                                                                                                                                                                                                                                                                                                                                               |
| Lower respiratory tract infection (LRTI)     | ICD-10-CM: A37.01, A37.11, A37.81, A37.91, J09.X1, J10.0, J10.00, J10.01, J10.08, J11.0, J11.00, J11.08, J12, J12.0, J12.1, J12.2, J12.3, J12.8, J12.81, J12.89, J12.9, J13, J14, J15, J15.0, J15.1, J15.2, J15.20, J15.21, J15.211, J15.212, J15.29, J15.3, J15.4, J15.5, J15.6, J15.7, J15.8, J15.9, J16, J16.8, J17, J18, J18.0, J18.1, J18.8, J18.9, J20, J20.0, J20.1, J20.2, J20.3, J20.4, J20.5, J20.6, J20.7, J20.8, J20.9, J21, J21.0, J21.1, J21.8, J21.9, J22, J40, J84.116, J84.2, J85.1, J95.851, P23.0                                                                                                                                                                                                                                                                                                                                                                                                                                                                                                                                                                                                                                                                                                                                                                                                                                                                                                                                                                                                                                                                                                                       |
| Congestive heart failure (CHF)               | ICD-10-CM: I110, I130, I132, I42, I420, I421, I422, I423, I424, I425, I427, I428, I429, I50, I501, I502, I5020, I5021, I5022, I5023, I503, I5030, I5031, I5032, I5033, I504, I5040, I5041, I5042, I5043, I508, I5081, I50810, I50811, I50812, I50813, I50814, I5082, I5083, I5084, I5089, I509                                                                                                                                                                                                                                                                                                                                                                                                                                                                                                                                                                                                                                                                                                                                                                                                                                                                                                                                                                                                                                                                                                                                                                                                                                                                                                                                             |
| Type 2 diabetes                              | ICD-10-CM: E11, E110, E1100, E111, E1110, E112, E1121, E1122, E1129, E113, E1131, E11311, E11319, E1132, E11321, E113211, E113212, E113213, E113219, E11329, E113291, E113292, E113293, E113299, E1133, E11331, E113311, E113312, E113313, E113319, E11339, E113391, E113392, E113393, E113399, E1134, E11341, E113411, E113412, E113413, E113419, E11349, E113491, E113492, E113493, E113499, E1135, E11351, E113511, E113512, E113513, E113519, E11352, E113521, E113522, E113523, E113529, E11353, E113531, E113532, E113533, E113539, E11354, E113541, E113542, E113543, E113549, E11355, E113551, E113552, E113553, E113559, E11359, E113591, E113592, E113593, E113599, E1136, E1137, E1137X1, E1137X2, E1137X3, E1137X9, E1139, E114, E1140, E1141, E1142, E1143, E1144, E1149, E115, E1151, E1152, E1159, E116, E1161, E11610, E11618, E11620, E11621, E1162, E11622, E11628, E1163, E11630, E11638, E1164, E11649, E1165, E1169, E118, E119                                                                                                                                                                                                                                                                                                                                                                                                                                                                                                                                                                                                                                                                                       |
| Chronic kidney disease (CKD)                 | ICD-10-CM: E0822, E0829, E0921, E0922, E1021, E1022, E1121, E1122, E1129, E1321, E1322, I129, I130, I131, I1310, K767, M3214, M3215, M3504, N010, N011, N012, N013, N014, N015, N016, N017, N018, N019, N020, N021, N022, N023, N024, N025, N026, N027, N028, N029, N03, N030, N031, N032, N033, N034, N035, N036, N037, N038, N039, N07, N070, N071, N072, N073, N074, N075, N076, N077, N078, N079, N08, N11, N111, N118, N119, N12, N140, N141, N142, N143, N144, N150, N158, N159, N16, N18, N181, N182, N183, N184, N185, N186, N189, N250, N2589, N259, Q6119, Q612, Z992, N01, N01A, N02, N02A, N03A, N07A, N110, N14, N1411, N1419, N1830, N1831, N1832                                                                                                                                                                                                                                                                                                                                                                                                                                                                                                                                                                                                                                                                                                                                                                                                                                                                                                                                                                            |
| Cancer                                       | ICD-10-CM: C844, C00, C000, C001, C002, C003, C004, C005, C006, C008, C009, C01, C02, C020, C021, C022, C023, C024, C028, C029, C03, C030, C031, C039, C04, C040, C041, C048, C049, C05, C050, C051, C052, C058, C059, C06, C060, C061, C062, C068, C0680, C0689, C069, C07, C08, C080, C081, C089, C09, C090, C091, C098, C099, C10, C100, C101, C102, C103, C104, C108, C109, C11, C110, C111, C112, C113, C118, C119, C12, C13, C130, C131, C132, C138, C139, C14, C140, C142, C148, C15, C153, C154, C155, C158, C159, C16, C160, C161, C162, C163, C164, C165, C166, C168, C169, C17, C170, C171, C172, C173, C178, C179, C18, C180, C181, C182, C183, C184, C185, C186, C187, C188, C189, C19, C20, C21, C210, C211, C212, C218, C22, C220, C221, C222, C223, C224, C227, C228, C229, C23, C24, C240, C241, C248, C249, C25, C250, C251, C252, C253, C254, C257, C258, C259, C26, C260, C261, C269, C30, C300, C301, C31, C310, C311, C312, C313, C318, C319, C32, C320, C321, C322, C323, C328, C329, C33, C34, C340, C3400, C3401, C3402, C341, C3410, C3411, C3412, C342, C343, C3430, C3431, C3432, C348, C3480, C3481, C3482, C349, C3490, C3491, C3492, C37, C38, C380, C381, C382, C383, C384, C388, C39, C390, C399, C40, C400, C4000, C4001, C4002, C401, C4010, C4011, C4012, C402, C4020, C4021, C4022, C403, C4030, C4031, C4032, C408, C4080, C4081, C4082, C409, C4090, C4091, C4092, C41, C410, C411, C412, C413, C414, C419, C43, C430, C431, C4310, C4311, C43111, C43112, C4312, C43121, C43122, C432, C4320, C4321, C4322, C433, C4330, C4331, C4339, C434, C435, C4351, C4352, C4359, C436, C4360, C4361, C4362, |

|  |                                                                                                                                                                                                                                                                                                                                                                                                                                                                                                                                                                                                                                                                                                                                                                                                                                                                                                                                                                                                                                                                                                                                                                                                                                                                                                                                                                                                                                                                                                                                                                                                                                                                                                                                                                                                                                                                                                                                                                                                                                                                                                                                                                                                                                                                                                                                                                                                                                                                                                                                                                                                                                                                                                                                                                                                                                                                                                                                                                                                                                                                                                                                                                                                                                                                                                                                                                                                                                                                                                                                                                                                                                                                                                                                                                                                                                                                                                                                                                                                                                                                                                                                                                                                                                                                                                                                                                                                                                                                                                                                                                                                                                                                                                                                                                                                                  |
|--|------------------------------------------------------------------------------------------------------------------------------------------------------------------------------------------------------------------------------------------------------------------------------------------------------------------------------------------------------------------------------------------------------------------------------------------------------------------------------------------------------------------------------------------------------------------------------------------------------------------------------------------------------------------------------------------------------------------------------------------------------------------------------------------------------------------------------------------------------------------------------------------------------------------------------------------------------------------------------------------------------------------------------------------------------------------------------------------------------------------------------------------------------------------------------------------------------------------------------------------------------------------------------------------------------------------------------------------------------------------------------------------------------------------------------------------------------------------------------------------------------------------------------------------------------------------------------------------------------------------------------------------------------------------------------------------------------------------------------------------------------------------------------------------------------------------------------------------------------------------------------------------------------------------------------------------------------------------------------------------------------------------------------------------------------------------------------------------------------------------------------------------------------------------------------------------------------------------------------------------------------------------------------------------------------------------------------------------------------------------------------------------------------------------------------------------------------------------------------------------------------------------------------------------------------------------------------------------------------------------------------------------------------------------------------------------------------------------------------------------------------------------------------------------------------------------------------------------------------------------------------------------------------------------------------------------------------------------------------------------------------------------------------------------------------------------------------------------------------------------------------------------------------------------------------------------------------------------------------------------------------------------------------------------------------------------------------------------------------------------------------------------------------------------------------------------------------------------------------------------------------------------------------------------------------------------------------------------------------------------------------------------------------------------------------------------------------------------------------------------------------------------------------------------------------------------------------------------------------------------------------------------------------------------------------------------------------------------------------------------------------------------------------------------------------------------------------------------------------------------------------------------------------------------------------------------------------------------------------------------------------------------------------------------------------------------------------------------------------------------------------------------------------------------------------------------------------------------------------------------------------------------------------------------------------------------------------------------------------------------------------------------------------------------------------------------------------------------------------------------------------------------------------------------------------------------|
|  | <p>C437, C4370, C4371, C4372, C438, C439, C45, C450, C451, C452, C457, C459, C46, C460, C461, C462, C463, C464, C465, C4650, C4651, C4652, C467, C469, C47, C470, C471, C4710, C4711, C4712, C472, C4720, C4721, C4722, C473, C474, C475, C476, C478, C479, C48, C480, C481, C482, C488, C49, C490, C491, C4910, C4911, C4912, C492, C4920, C4921, C4922, C493, C494, C495, C496, C498, C499, C49A, C49A0, C49A1, C49A2, C49A3, C49A4, C49A5, C49A9, C4A, C4A0, C4A1, C4A10, C4A11, C4A111, C4A112, C4A12, C4A121, C4A122, C4A2, C4A20, C4A21, C4A22, C4A3, C4A30, C4A31, C4A39, C4A4, C4A5, C4A51, C4A52, C4A59, C4A6, C4A60, C4A61, C4A62, C4A7, C4A70, C4A71, C4A72, C4A8, C4A9, C50, C500, C5001, C50011, C50012, C50019, C5002, C50021, C50022, C50029, C501, C5011, C50111, C50112, C50119, C5012, C50121, C50122, C50129, C502, C5021, C50211, C50212, C50219, C5022, C50221, C50222, C50229, C503, C5031, C50311, C50312, C50319, C5032, C50321, C50322, C50329, C504, C5041, C50411, C50412, C50419, C5042, C50421, C50422, C50429, C505, C5051, C50511, C50512, C50519, C5052, C50521, C50522, C50529, C506, C5061, C50611, C50612, C50619, C5062, C50621, C50622, C50629, C508, C5081, C50811, C50812, C50819, C5082, C50821, C50822, C50829, C509, C5091, C50911, C50912, C50919, C5092, C50921, C50922, C50929, C51, C510, C511, C512, C518, C519, C52, C53, C530, C531, C538, C539, C54, C540, C541, C542, C543, C548, C549, C55, C56, C561, C562, C569, C57, C570, C5700, C5701, C5702, C571, C5710, C5711, C5712, C572, C5720, C5721, C5722, C573, C574, C577, C578, C579, C58, C60, C600, C601, C602, C608, C609, C61, C62, C620, C6200, C6201, C6202, C621, C6210, C6211, C6212, C629, C6290, C6291, C6292, C63, C630, C6300, C6301, C6302, C631, C6310, C6311, C6312, C632, C637, C638, C639, C64, C641, C642, C649, C65, C651, C652, C659, C66, C661, C662, C669, C67, C670, C671, C672, C673, C674, C675, C676, C677, C678, C679, C68, C680, C681, C688, C689, C69, C690, C6900, C6901, C6902, C691, C6910, C6911, C6912, C692, C6920, C6921, C6922, C693, C6930, C6931, C6932, C694, C6940, C6941, C6942, C695, C6950, C6951, C6952, C696, C6960, C6961, C6962, C698, C6980, C6981, C6982, C699, C6990, C6991, C6992, C70, C700, C701, C709, C71, C710, C711, C712, C713, C714, C715, C716, C717, C718, C719, C72, C720, C721, C722, C7220, C7221, C7222, C723, C7230, C7231, C7232, C724, C7240, C7241, C7242, C725, C7250, C7259, C729, C73, C74, C740, C7400, C7401, C7402, C741, C7410, C7411, C7412, C749, C7490, C7491, C7492, C75, C750, C751, C752, C753, C754, C755, C758, C759, C76, C760, C761, C762, C763, C764, C7640, C7641, C7642, C765, C7650, C7651, C7652, C768, C77, C770, C771, C772, C773, C774, C775, C778, C779, C78, C780, C7800, C7801, C7802, C781, C782, C783, C7830, C7839, C784, C785, C786, C787, C788, C7880, C7889, C79, C790, C7900, C7901, C7902, C791, C7910, C7911, C7919, C792, C793, C7931, C7932, C794, C7940, C7949, C795, C7951, C7952, C796, C7960, C7961, C7962, C797, C7970, C7971, C7972, C798, C7981, C7982, C7989, C799, C7A, C7A0, C7A00, C7A01, C7A010, C7A011, C7A012, C7A019, C7A02, C7A020, C7A021, C7A022, C7A023, C7A024, C7A025, C7A026, C7A029, C7A09, C7A090, C7A091, C7A092, C7A093, C7A094, C7A095, C7A096, C7A098, C7A1, C7A8, C7B, C7B0, C7B00, C7B01, C7B02, C7B03, C7B04, C7B09, C7B1, C7B8, C80, C800, C801, C802, C81, C810, C8100, C8101, C8102, C8103, C8104, C8105, C8106, C8107, C8108, C8109, C811, C8110, C8111, C8112, C8113, C8114, C8115, C8116, C8117, C8118, C8119, C812, C8120, C8121, C8122, C8123, C8124, C8125, C8126, C8127, C8128, C8129, C813, C8130, C8131, C8132, C8133, C8134, C8135, C8136, C8137, C8138, C8139, C814, C8140, C8141, C8142, C8143, C8144, C8145, C8146, C8147, C8148, C8149, C817, C8170, C8171, C8172, C8173, C8174, C8175, C8176, C8177, C8178, C8179, C819, C8190, C8191, C8192, C8193, C8194, C8195, C8196, C8197, C8198, C8199, C82, C820, C8200, C8201, C8202, C8203, C8204, C8205, C8206, C8207, C8208, C8209, C821, C8210, C8211, C8212, C8213, C8214, C8215, C8216, C8217, C8218, C8219, C822, C8220, C8221, C8222, C8223, C8224, C8225, C8226, C8227, C8228, C8229, C823, C8230, C8231, C8232, C8233, C8234, C8235, C8236, C8237, C8238, C8239, C824, C8240, C8241, C8242, C8243, C8244, C8245, C8246, C8247, C8248, C8249, C825, C8250, C8251, C8252, C8253, C8254, C8255, C8256, C8257, C8258, C8259, C826, C8260, C8261, C8262, C8263, C8264, C8265, C8266, C8267, C8268, C8269, C828, C8280, C8281, C8282, C8283, C8284, C8285, C8286, C8287, C8288, C8289, C829, C8290, C8291, C8292, C8293, C8294, C8295, C8296, C8297, C8298, C8299, C83, C830, C8300, C8301, C8302, C8303, C8304, C8305, C8306, C8307, C8308, C8309, C831, C8310, C8311, C8312, C8313, C8314,</p> |
|--|------------------------------------------------------------------------------------------------------------------------------------------------------------------------------------------------------------------------------------------------------------------------------------------------------------------------------------------------------------------------------------------------------------------------------------------------------------------------------------------------------------------------------------------------------------------------------------------------------------------------------------------------------------------------------------------------------------------------------------------------------------------------------------------------------------------------------------------------------------------------------------------------------------------------------------------------------------------------------------------------------------------------------------------------------------------------------------------------------------------------------------------------------------------------------------------------------------------------------------------------------------------------------------------------------------------------------------------------------------------------------------------------------------------------------------------------------------------------------------------------------------------------------------------------------------------------------------------------------------------------------------------------------------------------------------------------------------------------------------------------------------------------------------------------------------------------------------------------------------------------------------------------------------------------------------------------------------------------------------------------------------------------------------------------------------------------------------------------------------------------------------------------------------------------------------------------------------------------------------------------------------------------------------------------------------------------------------------------------------------------------------------------------------------------------------------------------------------------------------------------------------------------------------------------------------------------------------------------------------------------------------------------------------------------------------------------------------------------------------------------------------------------------------------------------------------------------------------------------------------------------------------------------------------------------------------------------------------------------------------------------------------------------------------------------------------------------------------------------------------------------------------------------------------------------------------------------------------------------------------------------------------------------------------------------------------------------------------------------------------------------------------------------------------------------------------------------------------------------------------------------------------------------------------------------------------------------------------------------------------------------------------------------------------------------------------------------------------------------------------------------------------------------------------------------------------------------------------------------------------------------------------------------------------------------------------------------------------------------------------------------------------------------------------------------------------------------------------------------------------------------------------------------------------------------------------------------------------------------------------------------------------------------------------------------------------------------------------------------------------------------------------------------------------------------------------------------------------------------------------------------------------------------------------------------------------------------------------------------------------------------------------------------------------------------------------------------------------------------------------------------------------------------------------------------------------|

|                                 |                                                                                                                                                                                                                                                                                                                                                                                                                                                                                                                                                                                                                                                                                                                                                                                                                                                                                                                                                                                                                                                                                                                                                                                                                                                                                                                                                                                                                                                                                                                                                                                                                                                                                                                                                                                                                                                                                                                                                                                                                                                                                                                                                                                                                                                                                                                                                                                                                                                                                                                                                                                                                                                                              |
|---------------------------------|------------------------------------------------------------------------------------------------------------------------------------------------------------------------------------------------------------------------------------------------------------------------------------------------------------------------------------------------------------------------------------------------------------------------------------------------------------------------------------------------------------------------------------------------------------------------------------------------------------------------------------------------------------------------------------------------------------------------------------------------------------------------------------------------------------------------------------------------------------------------------------------------------------------------------------------------------------------------------------------------------------------------------------------------------------------------------------------------------------------------------------------------------------------------------------------------------------------------------------------------------------------------------------------------------------------------------------------------------------------------------------------------------------------------------------------------------------------------------------------------------------------------------------------------------------------------------------------------------------------------------------------------------------------------------------------------------------------------------------------------------------------------------------------------------------------------------------------------------------------------------------------------------------------------------------------------------------------------------------------------------------------------------------------------------------------------------------------------------------------------------------------------------------------------------------------------------------------------------------------------------------------------------------------------------------------------------------------------------------------------------------------------------------------------------------------------------------------------------------------------------------------------------------------------------------------------------------------------------------------------------------------------------------------------------|
|                                 | <p>C8315, C8316, C8317, C8318, C8319, C833, C8330, C8331, C8332, C8333, C8334, C8335, C8336, C8337, C8338, C8339, C835, C8350, C8351, C8352, C8353, C8354, C8355, C8356, C8357, C8358, C8359, C837, C8370, C8371, C8372, C8373, C8374, C8375, C8376, C8377, C8378, C8379, C838, C8380, C8381, C8382, C8383, C8384, C8385, C8386, C8387, C8388, C8389, C839, C8390, C8391, C8392, C8393, C8394, C8395, C8396, C8397, C8398, C8399, C84, C840, C8400, C8401, C8402, C8403, C8404, C8405, C8406, C8407, C8408, C8409, C841, C8410, C8411, C8412, C8413, C8414, C8415, C8416, C8417, C8418, C8419, C8440, C8441, C8442, C8443, C8444, C8445, C8446, C8447, C8448, C8449, C846, C8460, C8461, C8462, C8463, C8464, C8465, C8466, C8467, C8468, C8469, C847, C8470, C8471, C8472, C8473, C8474, C8475, C8476, C8477, C8478, C8479, C849, C8490, C8491, C8492, C8493, C8494, C8495, C8496, C8497, C8498, C8499, C84A, C84A0, C84A1, C84A2, C84A3, C84A4, C84A5, C84A6, C84A7, C84A8, C84A9, C84Z, C84Z0, C84Z1, C84Z2, C84Z3, C84Z4, C84Z5, C84Z6, C84Z7, C84Z8, C84Z9, C85, C851, C8510, C8511, C8512, C8513, C8514, C8515, C8516, C8517, C8518, C8519, C852, C8520, C8521, C8522, C8523, C8524, C8525, C8526, C8527, C8528, C8529, C858, C8580, C8581, C8582, C8583, C8584, C8585, C8586, C8587, C8588, C8589, C859, C8590, C8591, C8592, C8593, C8594, C8595, C8596, C8597, C8598, C8599, C86, C860, C861, C862, C863, C864, C865, C866, C88, C880, C882, C883, C884, C888, C889, C90, C900, C9000, C9001, C9002, C901, C9010, C9011, C9012, C902, C9020, C9021, C9022, C903, C9030, C9031, C9032, C91, C910, C9100, C9101, C9102, C911, C9110, C9111, C9112, C913, C9130, C9131, C9132, C914, C9140, C9141, C9142, C915, C9150, C9151, C9152, C916, C9160, C9161, C9162, C919, C9190, C9191, C9192, C91A, C91A0, C91A1, C91A2, C91Z, C91Z0, C91Z1, C91Z2, C92, C920, C9200, C9201, C9202, C921, C9210, C9211, C9212, C922, C9220, C9221, C9222, C923, C9230, C9231, C9232, C924, C9240, C9241, C9242, C925, C9250, C9251, C9252, C926, C9260, C9261, C9262, C929, C9290, C9291, C9292, C92A, C92A0, C92A1, C92A2, C92Z, C92Z0, C92Z1, C92Z2, C93, C930, C9300, C9301, C9302, C931, C9310, C9311, C9312, C933, C9330, C9331, C9332, C939, C9390, C9391, C9392, C93Z, C93Z0, C93Z1, C93Z2, C94, C940, C9400, C9401, C9402, C942, C9420, C9421, C9422, C943, C9430, C9431, C9432, C944, C9440, C9441, C9442, C946, C948, C9480, C9481, C9482, C95, C950, C9500, C9501, C9502, C951, C9510, C9511, C9512, C959, C9590, C9591, C9592, C96, C960, C962, C9620, C9621, C9622, C9629, C964, C965, C966, C969, C96A, C96Z, O9A1, O9A11, O9A111, O9A112, O9A113, O9A119, O9A12, O9A13</p> |
| <p>Immunocompromised status</p> | <p>ICD-10-CM (Diagnoses): B20, B9735, C802, C8100, C8101, C8102, C8103, C8104, C8105, C8106, C8107, C8108, C8109, C8110, C8111, C8112, C8113, C8114, C8115, C8116, C8117, C8118, C8119, C8120, C8121, C8122, C8123, C8124, C8125, C8126, C8127, C8128, C8129, C8130, C8131, C8132, C8133, C8134, C8135, C8136, C8137, C8138, C8139, C8140, C8141, C8142, C8143, C8144, C8145, C8146, C8147, C8148, C8149, C8170, C8171, C8172, C8173, C8174, C8175, C8176, C8177, C8178, C8179, C8190, C8191, C8192, C8193, C8194, C8195, C8196, C8197, C8198, C8199, C8200, C8201, C8202, C8203, C8204, C8205, C8206, C8207, C8208, C8209, C8210, C8211, C8212, C8213, C8214, C8215, C8216, C8217, C8218, C8219, C8220, C8221, C8222, C8223, C8224, C8225, C8226, C8227, C8228, C8229, C8230, C8231, C8232, C8233, C8234, C8235, C8236, C8237, C8238, C8239, C8240, C8241, C8242, C8243, C8244, C8245, C8246, C8247, C8248, C8249, C8250, C8251, C8252, C8253, C8254, C8255, C8256, C8257, C8258, C8259, C8260, C8261, C8262, C8263, C8264, C8265, C8266, C8267, C8268, C8269, C8280, C8281, C8282, C8283, C8284, C8285, C8286, C8287, C8288, C8289, C8290, C8291, C8292, C8293, C8294, C8295, C8296, C8297, C8298, C8299, C8300, C8301, C8302, C8303, C8304, C8305, C8306, C8307, C8308, C8309, C8310, C8311, C8312, C8313, C8314, C8315, C8316, C8317, C8318, C8319, C8330, C8331, C8332, C8333, C8334, C8335, C8336, C8337, C8338, C8339, C8350, C8351, C8352, C8353, C8354, C8355, C8356, C8357, C8358, C8359, C8370, C8371, C8372, C8373, C8374, C8375, C8376, C8377, C8378, C8379, C8380, C8381, C8382, C8383, C8384, C8385, C8386, C8387, C8388, C8389, C8390, C8391, C8392, C8393, C8394, C8395, C8396, C8397, C8398, C8399, C8400, C8401, C8402, C8403, C8404, C8405, C8406, C8407, C8408, C8409, C8410, C8411, C8412, C8413, C8414, C8415, C8416, C8417, C8418, C8419, C8440, C8441, C8442, C8443, C8444, C8445, C8446, C8447, C8448, C8449, C8460, C8461, C8462, C8463, C8464, C8465, C8466, C8467, C8468, C8469, C8470, C8471, C8472, C8473, C8474, C8475, C8476, C8477, C8478, C8479, C847A, C8490, C8491, C8492, C8493, C8494, C8495, C8496, C8497, C8498,</p>                                                                                                                                                                                                                                                                                                                                                                                                                                                                                                                |

|  |                                                                                                                                                                                                                                                                                                                                                                                                                                                                                                                                                                                                                                                                                                                                                                                                                                                                                                                                                                                                                                                                                                                                                                                                                                                                                                                                                                                                                                                                                                                                                                                                                                                                                                                                                                                                                                                                                                                                                                                                                                                                                                                                                                                                                                                                                                                                                                                                                                                                                                                                                                                                                                                                                                                                                                                                                                                                                                                                                                                                                                                                                                                                                                                                                                                                                                                                                                                                                                                                                                                                                                                                                                                                                                                                                                                                                                                                                                                                                                                                                                                                                                                                                                                                                                                                                                                                                                                                                                                                                                                                                                                                                                                                   |
|--|-------------------------------------------------------------------------------------------------------------------------------------------------------------------------------------------------------------------------------------------------------------------------------------------------------------------------------------------------------------------------------------------------------------------------------------------------------------------------------------------------------------------------------------------------------------------------------------------------------------------------------------------------------------------------------------------------------------------------------------------------------------------------------------------------------------------------------------------------------------------------------------------------------------------------------------------------------------------------------------------------------------------------------------------------------------------------------------------------------------------------------------------------------------------------------------------------------------------------------------------------------------------------------------------------------------------------------------------------------------------------------------------------------------------------------------------------------------------------------------------------------------------------------------------------------------------------------------------------------------------------------------------------------------------------------------------------------------------------------------------------------------------------------------------------------------------------------------------------------------------------------------------------------------------------------------------------------------------------------------------------------------------------------------------------------------------------------------------------------------------------------------------------------------------------------------------------------------------------------------------------------------------------------------------------------------------------------------------------------------------------------------------------------------------------------------------------------------------------------------------------------------------------------------------------------------------------------------------------------------------------------------------------------------------------------------------------------------------------------------------------------------------------------------------------------------------------------------------------------------------------------------------------------------------------------------------------------------------------------------------------------------------------------------------------------------------------------------------------------------------------------------------------------------------------------------------------------------------------------------------------------------------------------------------------------------------------------------------------------------------------------------------------------------------------------------------------------------------------------------------------------------------------------------------------------------------------------------------------------------------------------------------------------------------------------------------------------------------------------------------------------------------------------------------------------------------------------------------------------------------------------------------------------------------------------------------------------------------------------------------------------------------------------------------------------------------------------------------------------------------------------------------------------------------------------------------------------------------------------------------------------------------------------------------------------------------------------------------------------------------------------------------------------------------------------------------------------------------------------------------------------------------------------------------------------------------------------------------------------------------------------------------------------------------|
|  | <p>C8499, C84A0, C84A1, C84A2, C84A3, C84A4, C84A5, C84A6, C84A7, C84A8, C84A9, C84Z0, C84Z1, C84Z2, C84Z3, C84Z4, C84Z5, C84Z6, C84Z7, C84Z8, C84Z9, C8510, C8511, C8512, C8513, C8514, C8515, C8516, C8517, C8518, C8519, C8520, C8521, C8522, C8523, C8524, C8525, C8526, C8527, C8528, C8529, C8580, C8581, C8582, C8583, C8584, C8585, C8586, C8587, C8588, C8589, C8590, C8591, C8592, C8593, C8594, C8595, C8596, C8597, C8598, C8599, C860, C861, C862, C863, C864, C865, C866, C880, C882, C883, C884, C888, C889, C9000, C9001, C9002, C9010, C9011, C9012, C9020, C9021, C9022, C9030, C9031, C9032, C9100, C9101, C9102, C9110, C9111, C9112, C9130, C9131, C9132, C9140, C9141, C9142, C9150, C9151, C9152, C9160, C9161, C9162, C9190, C9191, C9192, C91A0, C91A1, C91A2, C91Z0, C91Z1, C91Z2, C9200, C9201, C9202, C9210, C9211, C9212, C9220, C9221, C9222, C9240, C9241, C9242, C9250, C9251, C9252, C9260, C9261, C9262, C9290, C9291, C9292, C92A0, C92A1, C92A2, C92Z0, C92Z1, C92Z2, C9300, C9301, C9302, C9310, C9311, C9312, C9330, C9331, C9332, C9390, C9391, C9392, C93Z0, C93Z1, C93Z2, C9400, C9401, C9402, C9420, C9421, C9422, C9430, C9431, C9432, C9440, C9441, C9442, C946, C9480, C9481, C9482, C9500, C9501, C9502, C9510, C9511, C9512, C9590, C9591, C9592, C960, C962, C9620, C9621, C9629, C965, C966, C969, C96Z, D47Z1, D800, D801, D802, D803, D804, D805, D806, D807, D808, D809, D810, D811, D812, D813, D8130, D8131, D8132, D8139, D814, D815, D816, D817, D81810, D81818, D81819, D8189, D819, D820, D821, D822, D823, D824, D828, D829, D830, D831, D832, D838, D839, D840, D841, D848, D84821, D84822, D8489, D849, D860, D861, D862, D863, D8681, D8682, D8683, D8684, D8685, D8686, D8687, D8689, D869, D890, D891, D892, D893, D8940, D8941, D8942, D8943, D8944, D8949, D8982, D8989, D899, M3111, O98711, O98712, O98713, O98719, O9872, O9873, T8600, T8601, T8602, T8603, T8609, T8610, T8611, T8612, T8613, T8619, T8620, T8621, T8622, T8623, T86290, T86298, T8630, T8631, T8632, T8633, T8639, T8640, T8641, T8642, T8643, T8649, T865, T86810, T86811, T86812, T86818, T86819, T86820, T86821, T86822, T86828, T86829, T86830, T86831, T86832, T86838, T86839, T86840, T868401, T868402, T868403, T868409, T86841, T868411, T868412, T868413, T868419, T86842, T868421, T868422, T868423, T868429, T86848, T868481, T868482, T868483, T868489, T86849, T868491, T868492, T868493, T868499, T86850, T86851, T86852, T86858, T86859, T86890, T86891, T86892, T86898, T86899, T8690, T8691, T8692, T8693, T8699, Y830, Z21, Z4821, Z4822, Z4823, Z4824, Z48280, Z48288, Z48290, Z48298, Z9225, Z940, Z941, Z942, Z943, Z944, Z945, Z946, Z947, Z9481, Z9482, Z9483, Z9484, Z9489, Z949, , Procedures: 23440, 29868, 32851, 32852, 32853, 32854, 33927, 33929, 33935, 33945, 38204, 38205, 38206, 38207, 38208, 38209, 38210, 38211, 38212, 38213, 38214, 38215, 38231, 38240, 38240, 38241, 38241, 38242, 38242, 38243, 38243, 43625, 44135, 44136, 44137, 47135, 47136, 48160, 48554, 48556, 50340, 50360, 50365, 50366, 50370, 50380, 60510, 60512, 65710, 65720, 65725, 65730, 65740, 65745, 65755, 65756, 65767, 65780, 65781, 65781, 65782, 76776, 76778, 80145, 80158, 80195, 80197, 80230, 81267, 81268, 81495, 81595, 86367, 86587, 86915, 0055U, 0087U, 0088U, 0141T, 0142T, 0143T, 02Y, 02YA, 02YA0Z0, 02YA0Z1, 02YA0Z2, 0564T, 0584T, 0585T, 0586T, 07Y, 07YM, 07YM0Z0, 07YM0Z1, 07YM0Z2, 07YP, 07YPOZ0, 07YPOZ1, 07YPOZ2, 0BY, 0BYC, 0BYCOZ0, 0BYCOZ1, 0BYCOZ2, 0BYD, 0BYD0Z0, 0BYD0Z1, 0BYD0Z2, 0BYF, 0BYF0Z0, 0BYF0Z1, 0BYF0Z2, 0BYG, 0BYG0Z0, 0BYG0Z1, 0BYG0Z2, 0BYH, 0BYH0Z0, 0BYH0Z1, 0BYH0Z2, 0BYJ, 0BYJ0Z0, 0BYJ0Z1, 0BYJ0Z2, 0BYK, 0BYK0Z0, 0BYK0Z1, 0BYK0Z2, 0BYL, 0BYL0Z0, 0BYL0Z1, 0BYL0Z2, 0BYM, 0BYM0Z0, 0BYM0Z1, 0BYM0Z2, 0DY, 0DY5, 0DY50Z0, 0DY50Z1, 0DY50Z2, 0DY6, 0DY60Z0, 0DY60Z1, 0DY60Z2, 0DY8, 0DY80Z0, 0DY80Z1, 0DY80Z2, 0DYE, 0DYE0Z0, 0DYE0Z1, 0DYE0Z2, 0FY, 0FY0, 0FY00Z0, 0FY00Z1, 0FY00Z2, 0FYG, 0FYGOZ0, 0FYGOZ1, 0FYGOZ2, 0TY, 0TY0, 0TY00Z0, 0TY00Z1, 0TY00Z2, 0TY1, 0TY10Z0, 0TY10Z1, 0TY10Z2, 0UY, 0UY0, 0UY00Z0, 0UY00Z1, 0UY00Z2, 0UY1, 0UY10Z0, 0UY10Z1, 0UY10Z2, 0UY9, 0UY90Z0, 0UY90Z1, 0UY90Z2, 0WY, 0WY2, 0WY20Z0, 0WY20Z1, 0XY, 0XY1, 0XYJ0Z0, 0XYJ0Z1, 0XYK, 0XYK0Z0, 0XYK0Z1, 30230AZ, 30230U2, 30230U3, 30230U4, 30230X0, 30230X1, 30230X2, 30230X3, 30230X4, 30230Y0, 30230Y1, 30230Y2, 30230Y3, 30230Y4, 30233AZ, 30233U2, 30233U3, 30233U4, 30233X0, 30233X1, 30233X2, 30233X3, 30233X4, 30233Y0, 30233Y1, 30233Y2, 30233Y3, 30233Y4, 30240AZ, 30240U2, 30240U3, 30240U4, 30240X0, 30240X1, 30240X2, 30240X3, 30240X4, 30240Y0, 30240Y1,</p> |
|--|-------------------------------------------------------------------------------------------------------------------------------------------------------------------------------------------------------------------------------------------------------------------------------------------------------------------------------------------------------------------------------------------------------------------------------------------------------------------------------------------------------------------------------------------------------------------------------------------------------------------------------------------------------------------------------------------------------------------------------------------------------------------------------------------------------------------------------------------------------------------------------------------------------------------------------------------------------------------------------------------------------------------------------------------------------------------------------------------------------------------------------------------------------------------------------------------------------------------------------------------------------------------------------------------------------------------------------------------------------------------------------------------------------------------------------------------------------------------------------------------------------------------------------------------------------------------------------------------------------------------------------------------------------------------------------------------------------------------------------------------------------------------------------------------------------------------------------------------------------------------------------------------------------------------------------------------------------------------------------------------------------------------------------------------------------------------------------------------------------------------------------------------------------------------------------------------------------------------------------------------------------------------------------------------------------------------------------------------------------------------------------------------------------------------------------------------------------------------------------------------------------------------------------------------------------------------------------------------------------------------------------------------------------------------------------------------------------------------------------------------------------------------------------------------------------------------------------------------------------------------------------------------------------------------------------------------------------------------------------------------------------------------------------------------------------------------------------------------------------------------------------------------------------------------------------------------------------------------------------------------------------------------------------------------------------------------------------------------------------------------------------------------------------------------------------------------------------------------------------------------------------------------------------------------------------------------------------------------------------------------------------------------------------------------------------------------------------------------------------------------------------------------------------------------------------------------------------------------------------------------------------------------------------------------------------------------------------------------------------------------------------------------------------------------------------------------------------------------------------------------------------------------------------------------------------------------------------------------------------------------------------------------------------------------------------------------------------------------------------------------------------------------------------------------------------------------------------------------------------------------------------------------------------------------------------------------------------------------------------------------------------------------------------------------|

|                                                                                                                                                                                                                                                                                                                                                                                                                                                                                                                                                                                                                                                                                                                                                                                                                                                                                                                                                                                                                                                                                                                                                                                                                                                                                                                                                                                                                                                                                                                                                                                                                                                                                                                                                                                                                                                                                                                                                                                                                                                                                                                                                                                                                                                                                                                                                                                                                                                                                                                                                                                                                                                                                                                                                                                                                                                                                                                                                                                                                                                                                                                                                                                                                                                                                                                                                                                                                                                                                                                                                                                                                                                                                                                                                                                                                                                                                                                                                                                                                                                                                                                                                                                                                                                                                                                                                                                                                                                                                                                                                                     |
|---------------------------------------------------------------------------------------------------------------------------------------------------------------------------------------------------------------------------------------------------------------------------------------------------------------------------------------------------------------------------------------------------------------------------------------------------------------------------------------------------------------------------------------------------------------------------------------------------------------------------------------------------------------------------------------------------------------------------------------------------------------------------------------------------------------------------------------------------------------------------------------------------------------------------------------------------------------------------------------------------------------------------------------------------------------------------------------------------------------------------------------------------------------------------------------------------------------------------------------------------------------------------------------------------------------------------------------------------------------------------------------------------------------------------------------------------------------------------------------------------------------------------------------------------------------------------------------------------------------------------------------------------------------------------------------------------------------------------------------------------------------------------------------------------------------------------------------------------------------------------------------------------------------------------------------------------------------------------------------------------------------------------------------------------------------------------------------------------------------------------------------------------------------------------------------------------------------------------------------------------------------------------------------------------------------------------------------------------------------------------------------------------------------------------------------------------------------------------------------------------------------------------------------------------------------------------------------------------------------------------------------------------------------------------------------------------------------------------------------------------------------------------------------------------------------------------------------------------------------------------------------------------------------------------------------------------------------------------------------------------------------------------------------------------------------------------------------------------------------------------------------------------------------------------------------------------------------------------------------------------------------------------------------------------------------------------------------------------------------------------------------------------------------------------------------------------------------------------------------------------------------------------------------------------------------------------------------------------------------------------------------------------------------------------------------------------------------------------------------------------------------------------------------------------------------------------------------------------------------------------------------------------------------------------------------------------------------------------------------------------------------------------------------------------------------------------------------------------------------------------------------------------------------------------------------------------------------------------------------------------------------------------------------------------------------------------------------------------------------------------------------------------------------------------------------------------------------------------------------------------------------------------------------------------------------------|
| <p>30240Y2, 30240Y3, 30240Y4, 30243AZ, 30243U2, 30243U3, 30243U4, 30243X0, 30243X1, 30243X2, 30243X3, 30243X4, 30243Y0, 30243Y1, 30243Y2, 30243Y3, 30243Y4, 30250X0, 30250X1, 30250Y0, 30250Y1, 30253X0, 30253X1, 30253Y0, 30253Y1, 30260X0, 30260X1, 30260Y0, 30260Y1, 30263X0, 30263X1, 30263Y0, 30263Y1, 3E0Q0AZ, 3E0Q0E0, 3E0Q0E1, 3E0Q3AZ, 3E0Q3E0, 3E0Q3E1, 3E0R0AZ, 3E0R0E0, 3E0R0E1, 3E0R3AZ, 3E0R3E0, 3E0R3E1, 6A550ZT, 6A550ZV, 6A551ZT, 6A551ZV, C1084, C1086, C1178, C9003, C9006, C9012, C9020, C9024, C9042, C9050, C9106, C9110, C9119, C9126, C9127, C9129, C9131, C9205, C9207, C9211, C9212, C9213, C9214, C9215, C9218, C9230, C9231, C9235, C9236, C9239, C9240, C9243, C9249, C9253, C9257, C9259, C9260, C9261, C9264, C9265, C9272, C9276, C9284, C9286, C9287, C9289, C9292, C9295, C9414, C9418, C9419, C9420, C9421, C9423, C9424, C9425, C9426, C9427, C9428, C9431, C9432, C9433, C9436, C9437, C9438, C9455, C9466, C9467, C9481, C9487, G0267, G0341, G0342, G0343, G8727, G9835, G9837, J0129, J0135, J0202, J0207, J0215, J0480, J0485, J0490, J0517, J0594, J0638, J0717, J0718, J0894, J0897, J1300, J1438, J1440, J1441, J1442, J1446, J1447, J1602, J1745, J1825, J1826, J1830, J2182, J2323, J2425, J2504, J2505, J2786, J2793, J2820, J2860, J2910, J3262, J3357, J3358, J7315, J7500, J7501, J7502, J7503, J7507, J7508, J7513, J7515, J7516, J7517, J7520, J7525, J8510, J8530, J8560, J8565, J8700, J9010, J9015, J9015, J9017, J9019, J9020, J9025, J9027, J9033, J9034, J9035, J9036, J9041, J9042, J9043, J9044, J9045, J9047, J9050, J9055, J9060, J9062, J9065, J9070, J9080, J9090, J9091, J9092, J9093, J9094, J9095, J9096, J9097, J9120, J9130, J9140, J9150, J9151, J9153, J9160, J9170, J9171, J9181, J9182, J9190, J9200, J9207, J9208, J9209, J9210, J9212, J9212, J9213, J9214, J9215, J9216, J9228, J9245, J9250, J9260, J9261, J9263, J9264, J9265, J9266, J9267, J9268, J9270, J9280, J9290, J9291, J9302, J9303, J9305, J9306, J9307, J9310, J9311, J9312, J9315, J9320, J9328, J9330, J9340, J9354, J9355, J9356, K0119, K0120, K0122, K0412, Q2012, Q2017, Q2019, Q2024, Q2044, Q3025, Q3026, Q3027, Q3028, Q4053, Q4079, Q5101, Q5102, Q5103, Q5104, Q5107, Q5108, Q5109, Q5110, Q5111, Q5112, Q5113, Q5114, Q5115, Q5116, Q5117, Q5118, Q9979, Q9989, S0087, S0115, S0116, S0135, S0145, S0146, S0148, S0162, S0168, S0193, S2052, S2053, S2054, S2060, S2065, S2102, S2103, S2109, S2142, S2150, S2150, S2152, Medications (NDC Codes): 00002418230, 00002473230, 00002762301, 00002764001, 00003037113, 00003037113, 00003052411, 00003052711, 00003052811, 00003085222, 00003085522, 00003085722, 00003218710, 00003218710, 00003218713, 00003218811, 00003218811, 00003218831, 00003218831, 00003218851, 00003218851, 00003232711, 00003232822, 00003281411, 00003281411, 00003281811, 00003281811, 00004025001, 00004025901, 00004025901, 00004025901, 00004025905, 00004025905, 00004025905, 00004025943, 00004025943, 00004025943, 00004026001, 00004026001, 00004026001, 00004026043, 00004026043, 00004026043, 00004026129, 00004026129, 00004026129, 00004026129, 00004029809, 00004029809, 00004029809, 00004029830, 00004029830, 00004035009, 00004035009, 00004035039, 00004035039, 00004035239, 00004035239, 00004035730, 00004035730, 00004036030, 00004036030, 00004036530, 00004036530, 00004110020, 00004110051, 00004110116, 00004110150, 00004110175, 00004193508, 00004197701, 00004198709, 00004198809, 00004199309, 00004200509, 00004200709, 00004200909, 00004201009, 00004201109, 00004201209, 00004201507, 00004201509, 00004201607, 00004201609, 00004201707, 00004201709, 00004690009, 00004690033, 00005450704, 00005450705, 00005450707, 00005450709, 00005450723, 00005450791, 00005465091, 00005465490, 00006056840, 00006329822, 00006430501, 00006430501, 00006430502, 00006430502, 00006461200, 00006503301, 00006503302, 00006503401, 00006503402, 00007440101, 00007440106, 00007487918, 00008103001, 00008103001, 00008103002, 00008103002, 00008103003, 00008103003, 00008103004, 00008103004, 00008103005, 00008103005, 00008103006, 00008103006, 00008103007, 00008103007, 00008103008, 00008103008, 00008103014, 00008103014, 00008103015, 00008103015, 00008103105, 00008103105, 00008103110, 00008103110, 00008103205, 00008103205, 00008104005, 00008104005, 00008104010, 00008104010, 00008104105, 00008104105, 00008104110, 00008104110, 00008104205, 00008104205, 00008117901, 00008117901, 00008117901, 00008117901, 00008117905, 00008117905,</p> |
|---------------------------------------------------------------------------------------------------------------------------------------------------------------------------------------------------------------------------------------------------------------------------------------------------------------------------------------------------------------------------------------------------------------------------------------------------------------------------------------------------------------------------------------------------------------------------------------------------------------------------------------------------------------------------------------------------------------------------------------------------------------------------------------------------------------------------------------------------------------------------------------------------------------------------------------------------------------------------------------------------------------------------------------------------------------------------------------------------------------------------------------------------------------------------------------------------------------------------------------------------------------------------------------------------------------------------------------------------------------------------------------------------------------------------------------------------------------------------------------------------------------------------------------------------------------------------------------------------------------------------------------------------------------------------------------------------------------------------------------------------------------------------------------------------------------------------------------------------------------------------------------------------------------------------------------------------------------------------------------------------------------------------------------------------------------------------------------------------------------------------------------------------------------------------------------------------------------------------------------------------------------------------------------------------------------------------------------------------------------------------------------------------------------------------------------------------------------------------------------------------------------------------------------------------------------------------------------------------------------------------------------------------------------------------------------------------------------------------------------------------------------------------------------------------------------------------------------------------------------------------------------------------------------------------------------------------------------------------------------------------------------------------------------------------------------------------------------------------------------------------------------------------------------------------------------------------------------------------------------------------------------------------------------------------------------------------------------------------------------------------------------------------------------------------------------------------------------------------------------------------------------------------------------------------------------------------------------------------------------------------------------------------------------------------------------------------------------------------------------------------------------------------------------------------------------------------------------------------------------------------------------------------------------------------------------------------------------------------------------------------------------------------------------------------------------------------------------------------------------------------------------------------------------------------------------------------------------------------------------------------------------------------------------------------------------------------------------------------------------------------------------------------------------------------------------------------------------------------------------------------------------------------------------------------------------------|

|                                                                                                                                                                                                                                                                                                                                                                                                                                                                                                                                                                                                                                                                                                                                                                                                                                                                                                                                                                                                                                                                                                                                                                                                                                                                                                                                                                                                                                                                                                                                                                                                                                                                                                                                                                                                                                                                                                                                                                                                                                                                                                                                                                                                                                                                                                                                                                                                                                                                                                                                                                                                                                                                                                                                                                                                                                                                                                                                                                                                                                                                                                                                                                                                                                                                                                                                                                                                                                                                                                                                                                                                                                                                                                                                                                                                                                                                                                                                                                                                                                                                                                                                                                                  |
|----------------------------------------------------------------------------------------------------------------------------------------------------------------------------------------------------------------------------------------------------------------------------------------------------------------------------------------------------------------------------------------------------------------------------------------------------------------------------------------------------------------------------------------------------------------------------------------------------------------------------------------------------------------------------------------------------------------------------------------------------------------------------------------------------------------------------------------------------------------------------------------------------------------------------------------------------------------------------------------------------------------------------------------------------------------------------------------------------------------------------------------------------------------------------------------------------------------------------------------------------------------------------------------------------------------------------------------------------------------------------------------------------------------------------------------------------------------------------------------------------------------------------------------------------------------------------------------------------------------------------------------------------------------------------------------------------------------------------------------------------------------------------------------------------------------------------------------------------------------------------------------------------------------------------------------------------------------------------------------------------------------------------------------------------------------------------------------------------------------------------------------------------------------------------------------------------------------------------------------------------------------------------------------------------------------------------------------------------------------------------------------------------------------------------------------------------------------------------------------------------------------------------------------------------------------------------------------------------------------------------------------------------------------------------------------------------------------------------------------------------------------------------------------------------------------------------------------------------------------------------------------------------------------------------------------------------------------------------------------------------------------------------------------------------------------------------------------------------------------------------------------------------------------------------------------------------------------------------------------------------------------------------------------------------------------------------------------------------------------------------------------------------------------------------------------------------------------------------------------------------------------------------------------------------------------------------------------------------------------------------------------------------------------------------------------------------------------------------------------------------------------------------------------------------------------------------------------------------------------------------------------------------------------------------------------------------------------------------------------------------------------------------------------------------------------------------------------------------------------------------------------------------------------------------------|
| 00008117905, 00008117905, 00009084401, 00013103691, 00013103695, 00013104694, 00013105694, 00013226686, 00013226691, 00013227686, 00013227691, 00013228686, 00013228691, 00013229686, 00013229691, 00013560693, 00013561693, 00013562693, 00013563670, 00013563673, 00013564670, 00013733691, 00013734694, 00013735688, 00015050041, 00015050141, 00015050241, 00015050301, 00015050302, 00015050303, 00015050348, 00015050401, 00015050541, 00015050641, 00015053941, 00015054641, 00015054712, 00015054741, 00015054812, 00015054841, 00015054912, 00015054941, 00015055605, 00015055611, 00015055641, 00015055711, 00015055741, 00015191012, 00015191113, 00015300120, 00015300197, 00015300220, 00015300222, 00015300620, 00015300697, 00015300720, 00015300797, 00015300820, 00015300897, 00015301218, 00015301238, 00015301260, 00015301297, 00015303020, 00015303120, 00015303220, 00015303410, 00015305020, 00015305097, 00015305920, 00015306120, 00015306124, 00015306220, 00015306224, 00015307020, 00015307220, 00015307519, 00015307597, 00015308060, 00015308420, 00015309145, 00015309520, 00015309530, 00015309595, 00015321030, 00015321076, 00015321130, 00015321176, 00015321230, 00015321276, 00015321329, 00015321330, 00015321429, 00015321430, 00015321529, 00015321530, 00015321630, 00015322022, 00015322026, 00015322097, 00015322122, 00015322126, 00015322197, 00015323011, 00015323111, 00015323211, 00015323311, 00015340420, 00015345620, 00015345699, 00015347520, 00015347527, 00015347530, 00015347620, 00015347627, 00015347630, 00015347911, 00015355410, 00015355427, 00015355610, 00015355626, 00015355741, 00015355801, 00015355841, 00015355941, 00015356410, 00015356415, 00024059010, 00024059120, 00024059240, 00024059602, 00024059704, 00024582315, 00024582411, 00024584301, 00024584305, 00024586001, 00024590801, 00024591001, 00024591100, 00024591102, 00024591400, 00024591401, 00024591402, 00024591500, 00024591501, 00024591502, 00024591520, 00024591701, 00024591800, 00024591801, 00024591802, 00024591900, 00024591901, 00024591902, 00024591920, 00024592001, 00024592201, 00026815110, 00026815120, 00034101901, 00039011301, 00039011401, 00054016325, 00054016325, 00054016325, 00054016329, 00054016329, 00054016625, 00054016625, 00054016625, 00054016625, 00054016629, 00054016629, 00054016629, 00054027121, 00054027223, 00054032003, 00054032006, 00054032103, 00054032106, 00054032203, 00054032206, 00054032303, 00054032306, 00054032403, 00054032406, 00054032503, 00054038225, 00054038325, 00054039925, 00054047021, 00054047121, 00054047221, 00054048013, 00054048014, 00054048113, 00054048114, 00054048213, 00054049713, 00054049714, 00054060421, 00054408425, 00054408425, 00054412925, 00054413025, 00054455015, 00054455025, 00054458111, 00054458127, 00054808425, 00054808425, 00054808925, 00054813025, 00054855003, 00054855005, 00054855006, 00054855007, 00054855010, 00054855025, 00069006701, 00069007001, 00069007401, 00069007601, 00069007801, 00069007901, 00069008101, 00069008407, 00069008618, 00069014601, 00069014602, 00069014701, 00069014702, 00069014801, 00069014901, 00069018101, 00069018102, 00069020101, 00069020401, 00069020410, 00069023801, 00069024901, 00069029101, 00069029110, 00069029201, 00069029210, 00069029301, 00069029310, 00069029401, 00069029410, 00069030501, 00069030601, 00069030801, 00069031501, 00069032401, 00069032401, 00069034201, 00069050114, 00069050130, 00069050230, 00069080901, 00069080901, 00069096101, 00069098301, 00069100101, 00069100201, 00069101001, 00069102901, 00069102902, 00069449522, 00069449622, 00069914111, 00069914122, 00069914211, 00069914222, 00069914411, 00074006702, 00074006702, 00074012402, 00074012402, 00074012403, 00074012403, 00074012404, 00074012404, 00074012474, 00074012474, 00074024302, 00074024302, 00074054130, 00074054130, 00074055402, 00074055402, 00074055471, 00074055471, 00074061602, 00074061602, 00074081702, 00074081702, 00074148501, 00074148502, 00074148503, 00074153903, 00074153903, 00074254003, 00074254003, 00074310832, 00074310832, 00074310932, 00074310932, |
|----------------------------------------------------------------------------------------------------------------------------------------------------------------------------------------------------------------------------------------------------------------------------------------------------------------------------------------------------------------------------------------------------------------------------------------------------------------------------------------------------------------------------------------------------------------------------------------------------------------------------------------------------------------------------------------------------------------------------------------------------------------------------------------------------------------------------------------------------------------------------------------------------------------------------------------------------------------------------------------------------------------------------------------------------------------------------------------------------------------------------------------------------------------------------------------------------------------------------------------------------------------------------------------------------------------------------------------------------------------------------------------------------------------------------------------------------------------------------------------------------------------------------------------------------------------------------------------------------------------------------------------------------------------------------------------------------------------------------------------------------------------------------------------------------------------------------------------------------------------------------------------------------------------------------------------------------------------------------------------------------------------------------------------------------------------------------------------------------------------------------------------------------------------------------------------------------------------------------------------------------------------------------------------------------------------------------------------------------------------------------------------------------------------------------------------------------------------------------------------------------------------------------------------------------------------------------------------------------------------------------------------------------------------------------------------------------------------------------------------------------------------------------------------------------------------------------------------------------------------------------------------------------------------------------------------------------------------------------------------------------------------------------------------------------------------------------------------------------------------------------------------------------------------------------------------------------------------------------------------------------------------------------------------------------------------------------------------------------------------------------------------------------------------------------------------------------------------------------------------------------------------------------------------------------------------------------------------------------------------------------------------------------------------------------------------------------------------------------------------------------------------------------------------------------------------------------------------------------------------------------------------------------------------------------------------------------------------------------------------------------------------------------------------------------------------------------------------------------------------------------------------------------------------------------------|

|                                                                                                                                                                                                                                                                                                                                                                                                                                                                                                                                                                                                                                                                                                                                                                                                                                                                                                                                                                                                                                                                                                                                                                                                                                                                                                                                                                                                                                                                                                                                                                                                                                                                                                                                                                                                                                                                                                                                                                                                                                                                                                                                                                                                                                                                                                                                                                                                                                                                                                                                                                                                                                                                                                                                                                                                                                                                                                                                                                                                                                                                                                                                                                                                                                                                                                                                                                                                                                                                                                                                                                                                                                                                                                                                                                                                                                                                                                                                                                                                                                                                                                                                                                                                                                                                                                                                                                                      |
|--------------------------------------------------------------------------------------------------------------------------------------------------------------------------------------------------------------------------------------------------------------------------------------------------------------------------------------------------------------------------------------------------------------------------------------------------------------------------------------------------------------------------------------------------------------------------------------------------------------------------------------------------------------------------------------------------------------------------------------------------------------------------------------------------------------------------------------------------------------------------------------------------------------------------------------------------------------------------------------------------------------------------------------------------------------------------------------------------------------------------------------------------------------------------------------------------------------------------------------------------------------------------------------------------------------------------------------------------------------------------------------------------------------------------------------------------------------------------------------------------------------------------------------------------------------------------------------------------------------------------------------------------------------------------------------------------------------------------------------------------------------------------------------------------------------------------------------------------------------------------------------------------------------------------------------------------------------------------------------------------------------------------------------------------------------------------------------------------------------------------------------------------------------------------------------------------------------------------------------------------------------------------------------------------------------------------------------------------------------------------------------------------------------------------------------------------------------------------------------------------------------------------------------------------------------------------------------------------------------------------------------------------------------------------------------------------------------------------------------------------------------------------------------------------------------------------------------------------------------------------------------------------------------------------------------------------------------------------------------------------------------------------------------------------------------------------------------------------------------------------------------------------------------------------------------------------------------------------------------------------------------------------------------------------------------------------------------------------------------------------------------------------------------------------------------------------------------------------------------------------------------------------------------------------------------------------------------------------------------------------------------------------------------------------------------------------------------------------------------------------------------------------------------------------------------------------------------------------------------------------------------------------------------------------------------------------------------------------------------------------------------------------------------------------------------------------------------------------------------------------------------------------------------------------------------------------------------------------------------------------------------------------------------------------------------------------------------------------------------------------------------|
| 00074379902, 00074379902, 00074379903, 00074379903, 00074379906,<br>00074379906, 00074433501, 00074433502, 00074433504, 00074433901,<br>00074433901, 00074433902, 00074433902, 00074433906, 00074433906,<br>00074433907, 00074433907, 00074433971, 00074433971, 00074433974,<br>00074433974, 00074507501, 00074507503, 00074564301, 00074564601,<br>00074565301, 00074565601, 00074565701, 00074566701, 00074634702,<br>00074634702, 00074646332, 00074646332, 00074647932, 00074647932,<br>00074726950, 00074726950, 00074937402, 00074937402, 00075064005,<br>00075800120, 00075800180, 00075800301, 00075800404, 00075999508,<br>00078010901, 00078010901, 00078010961, 00078010961, 00078011022,<br>00078011022, 00078024015, 00078024015, 00078024061, 00078024061,<br>00078024115, 00078024115, 00078024161, 00078024161, 00078024215,<br>00078024215, 00078024615, 00078024615, 00078024661, 00078024661,<br>00078024815, 00078024815, 00078024861, 00078024861, 00078027422,<br>00078027422, 00078033184, 00078033184, 00078038566, 00078038566,<br>00078038566, 00078038666, 00078038666, 00078038666, 00078039361,<br>00078039361, 00078041420, 00078041461, 00078041520, 00078041561,<br>00078041720, 00078041761, 00078042220, 00078042261, 00078049561,<br>00078049561, 00078056651, 00078056661, 00078056751, 00078056761,<br>00078056912, 00078056961, 00078056999, 00078058261, 00078059451,<br>00078059461, 00078061605, 00078061605, 00078061705, 00078061705,<br>00078061805, 00078061805, 00078062051, 00078062061, 00078062651,<br>00078062661, 00078062751, 00078062761, 00078062851, 00078062861,<br>00078066913, 00078066961, 00078068306, 00078068361, 00078069061,<br>00078073461, 00078100768, 00081004535, 00081013093, 00081039001,<br>00081039003, 00081059755, 00081059755, 00081059756, 00081059756,<br>00081059871, 00081059871, 00081063535, 00081071325, 00081080725,<br>00081080765, 00081088025, 00085012002, 00085012003, 00085012004,<br>00085012005, 00085028502, 00085053901, 00085057102, 00085057106,<br>00085064703, 00085064704, 00085064705, 00085068901, 00085076901,<br>00085092301, 00085095301, 00085111001, 00085113301, 00085116801,<br>00085117901, 00085117902, 00085118401, 00085118402, 00085119101,<br>00085119102, 00085123501, 00085123601, 00085123602, 00085123603,<br>00085124101, 00085124102, 00085124103, 00085124201, 00085124401,<br>00085124402, 00085124801, 00085124802, 00085124803, 00085125201,<br>00085125202, 00085125401, 00085125801, 00085125802, 00085125803,<br>00085125901, 00085125902, 00085127901, 00085127901, 00085128702,<br>00085128702, 00085128703, 00085128703, 00085129101, 00085129101,<br>00085129701, 00085129701, 00085129702, 00085129702, 00085130401,<br>00085130401, 00085131201, 00085131201, 00085131202, 00085131202,<br>00085131601, 00085131601, 00085131602, 00085131602, 00085132301,<br>00085132301, 00085132302, 00085132302, 00085136601, 00085136602,<br>00085136603, 00085136604, 00085136605, 00085136801, 00085136801,<br>00085137001, 00085137001, 00085137002, 00085137002, 00085138101,<br>00085138801, 00085138801, 00085138802, 00085138802, 00085141701,<br>00085141702, 00085141703, 00085142501, 00085142502, 00085142503,<br>00085142504, 00085142505, 00085143001, 00085143002, 00085143003,<br>00085143004, 00085143005, 00085151901, 00085151902, 00085151903,<br>00085151904, 00085151905, 00085300401, 00085300402, 00085300403,<br>00085300404, 00085300405, 00085434701, 00085434701, 00085434801,<br>00085434801, 00085434901, 00085434901, 00085435001, 00085435101,<br>00085435201, 00085435301, 00085435301, 00085435401, 00085435401,<br>00085435501, 00085435501, 00085435601, 00085435601, 00087050001,<br>00087050041, 00087050101, 00087050141, 00087050201, 00087050241,<br>00087050301, 00087050302, 00087050303, 00087050401, 00087050541,<br>00087050641, 00087054741, 00088216030, 00088216030, 00088216130,<br>00088216130, 00088216203, 00088216203, 00093017356, 00093017356,<br>00093017456, 00093017456, 00093551006, 00093574019, 00093574019,<br>00093574065, 00093574065, 00093574119, 00093574119, 00093574165,<br>00093574165, 00093574219, 00093574219, 00093574265, 00093574265,<br>00093703189, 00093703189, 00093703189, 00093703289, 00093703289,<br>00093703289, 00093733401, 00093733401, 00093733401, 00093733405, |
|--------------------------------------------------------------------------------------------------------------------------------------------------------------------------------------------------------------------------------------------------------------------------------------------------------------------------------------------------------------------------------------------------------------------------------------------------------------------------------------------------------------------------------------------------------------------------------------------------------------------------------------------------------------------------------------------------------------------------------------------------------------------------------------------------------------------------------------------------------------------------------------------------------------------------------------------------------------------------------------------------------------------------------------------------------------------------------------------------------------------------------------------------------------------------------------------------------------------------------------------------------------------------------------------------------------------------------------------------------------------------------------------------------------------------------------------------------------------------------------------------------------------------------------------------------------------------------------------------------------------------------------------------------------------------------------------------------------------------------------------------------------------------------------------------------------------------------------------------------------------------------------------------------------------------------------------------------------------------------------------------------------------------------------------------------------------------------------------------------------------------------------------------------------------------------------------------------------------------------------------------------------------------------------------------------------------------------------------------------------------------------------------------------------------------------------------------------------------------------------------------------------------------------------------------------------------------------------------------------------------------------------------------------------------------------------------------------------------------------------------------------------------------------------------------------------------------------------------------------------------------------------------------------------------------------------------------------------------------------------------------------------------------------------------------------------------------------------------------------------------------------------------------------------------------------------------------------------------------------------------------------------------------------------------------------------------------------------------------------------------------------------------------------------------------------------------------------------------------------------------------------------------------------------------------------------------------------------------------------------------------------------------------------------------------------------------------------------------------------------------------------------------------------------------------------------------------------------------------------------------------------------------------------------------------------------------------------------------------------------------------------------------------------------------------------------------------------------------------------------------------------------------------------------------------------------------------------------------------------------------------------------------------------------------------------------------------------------------------------------------------------------|



|                                                                                                                                                                                                                                                                                                                                                                                                                                                                                                                                                                                                                                                                                                                                                                                                                                                                                                                                                                                                                                                                                                                                                                                                                                                                                                                                                                                                                                                                                                                                                                                                                                                                                                                                                                                                                                                                                                                                                                                                                                                                                                                                                                                                                                                                                                                                                                                                                                                                                                                                                                                                                                                                                                                                                                                                                                                                                                                                                                                                                                                                                                                                                                                                                                                                                                                                                                                                                                                                                                                                                                                                                                                                                                                                                                                                                                                                                                                                                                                                                                                                                                                              |
|------------------------------------------------------------------------------------------------------------------------------------------------------------------------------------------------------------------------------------------------------------------------------------------------------------------------------------------------------------------------------------------------------------------------------------------------------------------------------------------------------------------------------------------------------------------------------------------------------------------------------------------------------------------------------------------------------------------------------------------------------------------------------------------------------------------------------------------------------------------------------------------------------------------------------------------------------------------------------------------------------------------------------------------------------------------------------------------------------------------------------------------------------------------------------------------------------------------------------------------------------------------------------------------------------------------------------------------------------------------------------------------------------------------------------------------------------------------------------------------------------------------------------------------------------------------------------------------------------------------------------------------------------------------------------------------------------------------------------------------------------------------------------------------------------------------------------------------------------------------------------------------------------------------------------------------------------------------------------------------------------------------------------------------------------------------------------------------------------------------------------------------------------------------------------------------------------------------------------------------------------------------------------------------------------------------------------------------------------------------------------------------------------------------------------------------------------------------------------------------------------------------------------------------------------------------------------------------------------------------------------------------------------------------------------------------------------------------------------------------------------------------------------------------------------------------------------------------------------------------------------------------------------------------------------------------------------------------------------------------------------------------------------------------------------------------------------------------------------------------------------------------------------------------------------------------------------------------------------------------------------------------------------------------------------------------------------------------------------------------------------------------------------------------------------------------------------------------------------------------------------------------------------------------------------------------------------------------------------------------------------------------------------------------------------------------------------------------------------------------------------------------------------------------------------------------------------------------------------------------------------------------------------------------------------------------------------------------------------------------------------------------------------------------------------------------------------------------------------------------------------|
| 00093733405, 00093733405, 00093733419, 00093733419, 00093733419, 00093733493, 00093733493, 00093733493, 00093747306, 00093747489, 00093747701, 00093747701, 00093747701, 00093747705, 00093747705, 00093747705, 00093759941, 00093759957, 00093760041, 00093760057, 00093760141, 00093760157, 00093760257, 00093763841, 00093763857, 00093763941, 00093763957, 00093776619, 00093776624, 00093776719, 00093776724, 00093776819, 00093776824, 00093901819, 00093901819, 00093901865, 00093901865, 00093901919, 00093901919, 00093901965, 00093901965, 00093902019, 00093902019, 00093902065, 00093902065, 00094532553, 00094532561, 00094532569, 00143920401, 00143920501, 00143924501, 00143924510, 00143927001, 00143927901, 00143928001, 00143930901, 00143936701, 00143937601, 00143950401, 00143950501, 00143951001, 00143951101, 00143951201, 00143951901, 00143951910, 00143953001, 00143953101, 00143956501, 00143956601, 00143956601, 00143960601, 00143983001, 00143987101, 00172375377, 00172375396, 00172375473, 00172375494, 00172375531, 00172375576, 00172375675, 00172375695, 00172731000, 00172731000, 00172731046, 00172731046, 00172731100, 00172731100, 00172731146, 00172731146, 00172731200, 00172731200, 00172731246, 00172731246, 00172731320, 00172731320, 00173004535, 00173013093, 00173059755, 00173059755, 00173059871, 00173059871, 00173063535, 00173071325, 00173080725, 00173080765, 00173080802, 00173080805, 00173082101, 00173082102, 00173082133, 00173088025, 00173088101, 00173089201, 00173089242, 00173089261, 00182153901, 00182153989, 00182153995, 00182306863, 00185093230, 00185093230, 00185093287, 00185093287, 00185093330, 00185093330, 00185093386, 00185093386, 00185093387, 00185093387, 00186142013, 00186142113, 00186142212, 00186142304, 00186157131, 00187200601, 00187200605, 00187200702, 00187200706, 00187395364, 00187552675, 00205455626, 00205465302, 00205465490, 00205532526, 00205532618, 00205532719, 00205532730, 00205533734, 00205533798, 00205533834, 00205933792, 00209306022, 00209307020, 00209308020, 00209309020, 00247128910, 00247139401, 00304216922, 00304217059, 00304217356, 00310048230, 00310051260, 00310173030, 00310173085, 00310183030, 00310183085, 00338399101, 00338399301, 00339650099, 00339650199, 00339650299, 00339650399, 00339650499, 00339650599, 00339650699, 00339650799, 00339650899, 00339650999, 00339651099, 00339651199, 00339651299, 00339651399, 00339651499, 00339651599, 00339651699, 00339651799, 00364249901, 00364249936, 00364302853, 00378000532, 00378000585, 00378000632, 00378000685, 00378000732, 00378000785, 00378001401, 00378001450, 00378100501, 00378100501, 00378204501, 00378204501, 00378204505, 00378204505, 00378204601, 00378204705, 00378204705, 00378225001, 00378225001, 00378225001, 00378225005, 00378225005, 00378225005, 00378251191, 00378251278, 00378309632, 00378309685, 00378309732, 00378309785, 00378309832, 00378309885, 00378326632, 00378326694, 00378354725, 00378354752, 00378420178, 00378420178, 00378420278, 00378420278, 00378420278, 00378447201, 00378447201, 00378447201, 00378447205, 00378447205, 00378447205, 00378526014, 00378526098, 00378526114, 00378526198, 00378526214, 00378526298, 00378526314, 00378526398, 00378526414, 00378526498, 00378526598, 00378695501, 00395808019, 00395808062, 00395810819, 00395810819, 00395810835, 00395810835, 00395810862, 00395810862, 00405464301, 00405464336, 00406200301, 00406200301, 00409001601, 00409020102, 00409020110, 00409020120, 00409020125, 00409020126, 00409020127, 00409036501, 00409036601, 00409036701, 00409036801, 00409080101, 00409080109, 00409111201, 00409111210, 00409112910, 00409112911, 00409112912, 00409173201, 00409202601, 00409423501, 00409506801, 00409787001, 00418014820, 00418017110, 00418019702, 00418019704, 00418019708, 00418021602, 00418022710, 00418022820, 00469060767, 00469060767, 00469060773, 00469060773, 00469061710, 00469061710, 00469061711, 00469061711, 00469061771, 00469061771, 00469061771, 00469061773, 00469061773, 00469064773, 00469064773, |
|------------------------------------------------------------------------------------------------------------------------------------------------------------------------------------------------------------------------------------------------------------------------------------------------------------------------------------------------------------------------------------------------------------------------------------------------------------------------------------------------------------------------------------------------------------------------------------------------------------------------------------------------------------------------------------------------------------------------------------------------------------------------------------------------------------------------------------------------------------------------------------------------------------------------------------------------------------------------------------------------------------------------------------------------------------------------------------------------------------------------------------------------------------------------------------------------------------------------------------------------------------------------------------------------------------------------------------------------------------------------------------------------------------------------------------------------------------------------------------------------------------------------------------------------------------------------------------------------------------------------------------------------------------------------------------------------------------------------------------------------------------------------------------------------------------------------------------------------------------------------------------------------------------------------------------------------------------------------------------------------------------------------------------------------------------------------------------------------------------------------------------------------------------------------------------------------------------------------------------------------------------------------------------------------------------------------------------------------------------------------------------------------------------------------------------------------------------------------------------------------------------------------------------------------------------------------------------------------------------------------------------------------------------------------------------------------------------------------------------------------------------------------------------------------------------------------------------------------------------------------------------------------------------------------------------------------------------------------------------------------------------------------------------------------------------------------------------------------------------------------------------------------------------------------------------------------------------------------------------------------------------------------------------------------------------------------------------------------------------------------------------------------------------------------------------------------------------------------------------------------------------------------------------------------------------------------------------------------------------------------------------------------------------------------------------------------------------------------------------------------------------------------------------------------------------------------------------------------------------------------------------------------------------------------------------------------------------------------------------------------------------------------------------------------------------------------------------------------------------------------------|

|                                                                                                                                                                                                                                                                                                                                                                                                                                                                                                                                                                                                                                                                                                                                                                                                                                                                                                                                                                                                                                                                                                                                                                                                                                                                                                                                                                                                                                                                                                                                                                                                                                                                                                                                                                                                                                                                                                                                                                                                                                                                                                                                                                                                                                                                                                                                                                                                                                                                                                                                                                                                                                                                                                                                                                                                                                                                                                                                                                                                                                                                                                                                                                                                                                                                                                                                                                                                                                                                                                                                                                                                                                                                                                                                                                                                                                                                                                                                                                                                                                                                                                                                                                                                            |
|------------------------------------------------------------------------------------------------------------------------------------------------------------------------------------------------------------------------------------------------------------------------------------------------------------------------------------------------------------------------------------------------------------------------------------------------------------------------------------------------------------------------------------------------------------------------------------------------------------------------------------------------------------------------------------------------------------------------------------------------------------------------------------------------------------------------------------------------------------------------------------------------------------------------------------------------------------------------------------------------------------------------------------------------------------------------------------------------------------------------------------------------------------------------------------------------------------------------------------------------------------------------------------------------------------------------------------------------------------------------------------------------------------------------------------------------------------------------------------------------------------------------------------------------------------------------------------------------------------------------------------------------------------------------------------------------------------------------------------------------------------------------------------------------------------------------------------------------------------------------------------------------------------------------------------------------------------------------------------------------------------------------------------------------------------------------------------------------------------------------------------------------------------------------------------------------------------------------------------------------------------------------------------------------------------------------------------------------------------------------------------------------------------------------------------------------------------------------------------------------------------------------------------------------------------------------------------------------------------------------------------------------------------------------------------------------------------------------------------------------------------------------------------------------------------------------------------------------------------------------------------------------------------------------------------------------------------------------------------------------------------------------------------------------------------------------------------------------------------------------------------------------------------------------------------------------------------------------------------------------------------------------------------------------------------------------------------------------------------------------------------------------------------------------------------------------------------------------------------------------------------------------------------------------------------------------------------------------------------------------------------------------------------------------------------------------------------------------------------------------------------------------------------------------------------------------------------------------------------------------------------------------------------------------------------------------------------------------------------------------------------------------------------------------------------------------------------------------------------------------------------------------------------------------------------------------------------|
| 00469065710, 00469065710, 00469065711, 00469065711, 00469065771, 00469065771, 00469065773, 00469065773, 00469067773, 00469067773, 00469068773, 00469068773, 00469123050, 00469123050, 00469133050, 00469133050, 00469148040, 00469171030, 00469171040, 00469171060, 00469171100, 00469197010, 00469197020, 00469197030, 00469216010, 00469227030, 00469228040, 00469288030, 00469301601, 00469301601, 00517086601, 00517086601, 00517086610, 00517086610, 00517092001, 00517092008, 00527516082, 00527516082, 00527516082, 00536399801, 00536399836, 00555035101, 00555035101, 00555035201, 00555035201, 00555057202, 00555057235, 00555057245, 00555057246, 00555057247, 00555057248, 00555057249, 00555080802, 00555092701, 00555092801, 00555092901, 00555094501, 00555198414, 00555198514, 00574086601, 00574086601, 00574086610, 00574086610, 00591221911, 00591222011, 00591222215, 00591222215, 00591222315, 00591222315, 00591222354, 00591222354, 00591222455, 00591222455, 00591283201, 00591289749, 00591333626, 00591333712, 00591333889, 00591335901, 00591335901, 00591345460, 00591368711, 00603449921, 00641226241, 00641226341, 00641226441, 00641226541, 00677161001, 00702000101, 00702000201, 00702171030, 00703301511, 00703301513, 00703301811, 00703301812, 00703301911, 00703301912, 00703312501, 00703312508, 00703321301, 00703321381, 00703321601, 00703321681, 00703321701, 00703321801, 00703321881, 00703324411, 00703324611, 00703324811, 00703324911, 00703326401, 00703326601, 00703326801, 00703326871, 00703327401, 00703327601, 00703327801, 00703342711, 00703342911, 00703367101, 00703367103, 00703367191, 00703367193, 00703367301, 00703367501, 00703367591, 00703367801, 00703367881, 00703398501, 00703398601, 00703400401, 00703410048, 00703410058, 00703410068, 00703410948, 00703410958, 00703410968, 00703423901, 00703423981, 00703424401, 00703424481, 00703424601, 00703424681, 00703424801, 00703424881, 00703424891, 00703430102, 00703430301, 00703463601, 00703476401, 00703476481, 00703476601, 00703476681, 00703476701, 00703476801, 00703476881, 00703507501, 00703507503, 00703564301, 00703564601, 00703565301, 00703565601, 00703565691, 00703565701, 00703565791, 00703566701, 00703566801, 00703572001, 00703573001, 00703574711, 00703574811, 00719154410, 00781105901, 00781105901, 00781107601, 00781107636, 00781206701, 00781206701, 00781206701, 00781206705, 00781206705, 00781206705, 00781206789, 00781206789, 00781206789, 00781210201, 00781210201, 00781210301, 00781210301, 00781210401, 00781210401, 00781269144, 00781269175, 00781269244, 00781269275, 00781269344, 00781269375, 00781269444, 00781269475, 00781269544, 00781269575, 00781269675, 00781313980, 00781323394, 00781324494, 00781325394, 00781325594, 00781329680, 00781331570, 00781331780, 00781347090, 00781347432, 00781505631, 00781505631, 00781505731, 00781505731, 00781507501, 00781507501, 00781517501, 00781517501, 00781517501, 00781517505, 00781517505, 00781517505, 00781925394, 00781930201, 00781930201, 00781930301, 00781930301, 00781930401, 00781930401, 00781931570, 00781931780, 00832028500, 00839790506, 00904174960, 00904174973, 00904601260, 00904642561, 00904642561, 00904662361, 00904662361, 00904662461, 00904662461, 00904678504, 00904678504, 00904678504, 00904678561, 00904678561, 00904678561, 00904678604, 00904678604, 00904678604, 00904678661, 00904678661, 00904678661, 00904686704, 00904686760, 00904707461, 00904707461, 00904707461, 00904707861, 00904707861, 00904707861, 00904707861, 00904709761, 00904709761, 00904714110, 00944381001, 00955102001, 00955102104, 00955102208, 00955172510, 00955172720, 00955173110, 00955173320, 00955173530, 00955173530, 00955173730, 00955173730, 00955174601, 10019091001, 10019091002, 10019091201, 10019091202, 10019091203, 10019091501, 10019091601, 10019091615, 10019091701, 10019092501, 10019092582, 10019092602, 10019092616, 10019093001, 10019093002, 10019093501, 10019093525, 10019093601, 10019093650, 10019093701, 10019093710, 10019093801, 10019093825, 10019093901, 10019093950, 10019094001, 10019094002, 10019094101, 10019094201, 10019094210, |
|------------------------------------------------------------------------------------------------------------------------------------------------------------------------------------------------------------------------------------------------------------------------------------------------------------------------------------------------------------------------------------------------------------------------------------------------------------------------------------------------------------------------------------------------------------------------------------------------------------------------------------------------------------------------------------------------------------------------------------------------------------------------------------------------------------------------------------------------------------------------------------------------------------------------------------------------------------------------------------------------------------------------------------------------------------------------------------------------------------------------------------------------------------------------------------------------------------------------------------------------------------------------------------------------------------------------------------------------------------------------------------------------------------------------------------------------------------------------------------------------------------------------------------------------------------------------------------------------------------------------------------------------------------------------------------------------------------------------------------------------------------------------------------------------------------------------------------------------------------------------------------------------------------------------------------------------------------------------------------------------------------------------------------------------------------------------------------------------------------------------------------------------------------------------------------------------------------------------------------------------------------------------------------------------------------------------------------------------------------------------------------------------------------------------------------------------------------------------------------------------------------------------------------------------------------------------------------------------------------------------------------------------------------------------------------------------------------------------------------------------------------------------------------------------------------------------------------------------------------------------------------------------------------------------------------------------------------------------------------------------------------------------------------------------------------------------------------------------------------------------------------------------------------------------------------------------------------------------------------------------------------------------------------------------------------------------------------------------------------------------------------------------------------------------------------------------------------------------------------------------------------------------------------------------------------------------------------------------------------------------------------------------------------------------------------------------------------------------------------------------------------------------------------------------------------------------------------------------------------------------------------------------------------------------------------------------------------------------------------------------------------------------------------------------------------------------------------------------------------------------------------------------------------------------------------------------------------|

|                                                                                                                                                                                                                                                                                                                                                                                                                                                                                                                                                                                                                                                                                                                                                                                                                                                                                                                                                                                                                                                                                                                                                                                                                                                                                                                                                                                                                                                                                                                                                                                                                                                                                                                                                                                                                                                                                                                                                                                                                                                                                                                                                                                                                                                                                                                                                                                                                                                                                                                                                                                                                                                                                                                                                                                                                                                                                                                                                                                                                                                                                                                                                                                                                                                                                                                                                                                                                                                                                                                                                                                                                                                                                                                                                                                                                                                                                                                                                                                                                                                                                                                                                                                               |
|-----------------------------------------------------------------------------------------------------------------------------------------------------------------------------------------------------------------------------------------------------------------------------------------------------------------------------------------------------------------------------------------------------------------------------------------------------------------------------------------------------------------------------------------------------------------------------------------------------------------------------------------------------------------------------------------------------------------------------------------------------------------------------------------------------------------------------------------------------------------------------------------------------------------------------------------------------------------------------------------------------------------------------------------------------------------------------------------------------------------------------------------------------------------------------------------------------------------------------------------------------------------------------------------------------------------------------------------------------------------------------------------------------------------------------------------------------------------------------------------------------------------------------------------------------------------------------------------------------------------------------------------------------------------------------------------------------------------------------------------------------------------------------------------------------------------------------------------------------------------------------------------------------------------------------------------------------------------------------------------------------------------------------------------------------------------------------------------------------------------------------------------------------------------------------------------------------------------------------------------------------------------------------------------------------------------------------------------------------------------------------------------------------------------------------------------------------------------------------------------------------------------------------------------------------------------------------------------------------------------------------------------------------------------------------------------------------------------------------------------------------------------------------------------------------------------------------------------------------------------------------------------------------------------------------------------------------------------------------------------------------------------------------------------------------------------------------------------------------------------------------------------------------------------------------------------------------------------------------------------------------------------------------------------------------------------------------------------------------------------------------------------------------------------------------------------------------------------------------------------------------------------------------------------------------------------------------------------------------------------------------------------------------------------------------------------------------------------------------------------------------------------------------------------------------------------------------------------------------------------------------------------------------------------------------------------------------------------------------------------------------------------------------------------------------------------------------------------------------------------------------------------------------------------------------------------------|
| 10019094301, 10019094325, 10019094401, 10019094450, 10019094501, 10019094510, 10019095002, 10019095501, 10019095550, 10019095601, 10019095616, 10019095701, 10019095711, 10019098201, 10019098209, 10019098401, 10019098409, 10139006005, 10139006015, 10139006045, 10139006202, 10139006210, 10139006240, 10139006301, 10139006310, 10139006311, 10139006312, 10139006320, 10139006350, 10370026801, 10518010207, 10518010208, 10518010209, 10695008521, 10695008521, 10695009802, 10695009802, 10702027703, 10702027703, 10702027803, 10702027803, 11845110401, 13811067730, 13811067730, 13811067830, 13811067830, 13925052301, 14789060007, 14789060010, 15210006112, 15210006312, 15210006612, 15210006712, 16714009801, 16714009801, 16714009901, 16714009901, 16714010001, 16714010001, 16714013701, 16714032101, 16714032101, 16714033101, 16714033101, 16714034501, 16714034501, 16714034501, 16714046501, 16714046701, 16714046801, 16714050001, 16714072701, 16714072801, 16714074901, 16714077701, 16714085701, 16714085801, 16714085901, 16714092701, 16714092801, 16729001901, 16729001901, 16729001901, 16729001916, 16729001916, 16729001916, 16729004101, 16729004101, 16729004201, 16729004201, 16729004301, 16729004301, 16729004853, 16729004854, 16729004953, 16729004954, 16729005053, 16729005053, 16729005153, 16729007212, 16729007329, 16729009401, 16729009401, 16729009401, 16729009416, 16729009416, 16729009416, 16729010811, 16729011408, 16729011411, 16729011431, 16729011505, 16729011638, 16729012049, 16729012953, 16729012954, 16729013053, 16729013054, 16729018929, 16729018929, 16729018929, 16729022130, 16729022130, 16729022130, 16729022130, 16729022361, 16729022361, 16729022361, 16729022361, 16729022405, 16729022850, 16729023163, 16729023164, 16729023165, 16729024605, 16729024711, 16729024838, 16729026129, 16729026129, 16729026129, 16729026231, 16729026763, 16729026764, 16729026765, 16729027603, 16729027605, 16729027611, 16729027638, 16729027667, 16729027668, 16729027703, 16729027730, 16729027735, 16729028811, 16729028838, 16729029512, 16729029531, 16729029533, 16729029534, 16729030610, 16729033203, 16729033205, 16729035103, 16729035192, 16729048601, 17478042240, 17478042240, 17478042240, 17478095740, 17478095740, 17478095740, 21695011100, 21695011130, 21695017000, 21695017000, 21695017100, 21695017100, 21695017100, 21695048475, 21695048475, 23155004303, 23155004303, 23155004403, 23155004403, 23155026131, 23155026141, 23155058931, 23155064731, 23155064941, 23155078831, 23155079041, 23490511009, 23490511009, 23490588900, 24338005008, 25021020205, 25021020215, 25021020245, 25021020251, 25021021015, 25021021120, 25021021250, 25021021305, 25021021317, 25021021350, 25021021598, 25021021599, 25021022160, 25021022201, 25021022204, 25021022207, 25021023120, 25021023310, 25021023320, 25021024110, 25021024501, 25021024504, 25021024602, 25682000101, 35356028000, 35356028000, 37803134102, 37803195003, 37803195003, 38779002501, 38779002503, 38779002504, 38779002505, 38779002506, 38779002509, 38779002510, 38779002525, 38779003503, 38779003504, 38779003506, 38779003510, 38779003511, 38779003515, 38779003525, 38779021203, 38779021206, 38779021211, 38779021215, 38779031203, 38779031203, 38779031204, 38779031204, 38779031206, 38779031206, 38779031211, 38779031211, 38779031215, 38779031215, 38779031225, 38779031225, 38779050603, 38779050604, 38779050605, 38779055303, 38779055306, 38779055307, 38779055309, 38779066001, 38779066001, 38779066003, 38779066003, 38779066004, 38779066004, 38779066005, 38779066005, 38779066006, 38779066006, 38779066008, 38779066008, 38779115600, 38779115603, 38779115606, 38779115607, 38779142703, 38779142704, 38779142706, 38779226303, 38779226304, 38779226304, 38779226308, 38779227200, 38779227200, 38779227203, 38779227203, 38779227204, 38779227204, 38779227206, 38779227206, 38779227209, 38779227209, 38779269800, 38779269800, 38779269803, 38779269803, 38779269804, 38779269804, 38779269806, 38779269806, 38779269807, 38779269807, 38779269809, 38779269809, 38779318501, 38779318503, 38779318504. |
|-----------------------------------------------------------------------------------------------------------------------------------------------------------------------------------------------------------------------------------------------------------------------------------------------------------------------------------------------------------------------------------------------------------------------------------------------------------------------------------------------------------------------------------------------------------------------------------------------------------------------------------------------------------------------------------------------------------------------------------------------------------------------------------------------------------------------------------------------------------------------------------------------------------------------------------------------------------------------------------------------------------------------------------------------------------------------------------------------------------------------------------------------------------------------------------------------------------------------------------------------------------------------------------------------------------------------------------------------------------------------------------------------------------------------------------------------------------------------------------------------------------------------------------------------------------------------------------------------------------------------------------------------------------------------------------------------------------------------------------------------------------------------------------------------------------------------------------------------------------------------------------------------------------------------------------------------------------------------------------------------------------------------------------------------------------------------------------------------------------------------------------------------------------------------------------------------------------------------------------------------------------------------------------------------------------------------------------------------------------------------------------------------------------------------------------------------------------------------------------------------------------------------------------------------------------------------------------------------------------------------------------------------------------------------------------------------------------------------------------------------------------------------------------------------------------------------------------------------------------------------------------------------------------------------------------------------------------------------------------------------------------------------------------------------------------------------------------------------------------------------------------------------------------------------------------------------------------------------------------------------------------------------------------------------------------------------------------------------------------------------------------------------------------------------------------------------------------------------------------------------------------------------------------------------------------------------------------------------------------------------------------------------------------------------------------------------------------------------------------------------------------------------------------------------------------------------------------------------------------------------------------------------------------------------------------------------------------------------------------------------------------------------------------------------------------------------------------------------------------------------------------------------------------------------------------------------|

|                                                                                                                                                                                                                                                                                                                                                                                                                                                                                                                                                                                                                                                                                                                                                                                                                                                                                                                                                                                                                                                                                                                                                                                                                                                                                                                                                                                                                                                                                                                                                                                                                                                                                                                                                                                                                                                                                                                                                                                                                                                                                                                                                                                                                                                                                                                                                                                                                                                                                                                                                                                                                                                                                                                                                                                                                                                                                                                                                                                                                                                                                                                                                                                                                                                                                                                                                                                                                                                                                                                                                                                                                                                                                                                                                                                                                                                                                                                                                                                                                                                                                                                                                                                                            |
|------------------------------------------------------------------------------------------------------------------------------------------------------------------------------------------------------------------------------------------------------------------------------------------------------------------------------------------------------------------------------------------------------------------------------------------------------------------------------------------------------------------------------------------------------------------------------------------------------------------------------------------------------------------------------------------------------------------------------------------------------------------------------------------------------------------------------------------------------------------------------------------------------------------------------------------------------------------------------------------------------------------------------------------------------------------------------------------------------------------------------------------------------------------------------------------------------------------------------------------------------------------------------------------------------------------------------------------------------------------------------------------------------------------------------------------------------------------------------------------------------------------------------------------------------------------------------------------------------------------------------------------------------------------------------------------------------------------------------------------------------------------------------------------------------------------------------------------------------------------------------------------------------------------------------------------------------------------------------------------------------------------------------------------------------------------------------------------------------------------------------------------------------------------------------------------------------------------------------------------------------------------------------------------------------------------------------------------------------------------------------------------------------------------------------------------------------------------------------------------------------------------------------------------------------------------------------------------------------------------------------------------------------------------------------------------------------------------------------------------------------------------------------------------------------------------------------------------------------------------------------------------------------------------------------------------------------------------------------------------------------------------------------------------------------------------------------------------------------------------------------------------------------------------------------------------------------------------------------------------------------------------------------------------------------------------------------------------------------------------------------------------------------------------------------------------------------------------------------------------------------------------------------------------------------------------------------------------------------------------------------------------------------------------------------------------------------------------------------------------------------------------------------------------------------------------------------------------------------------------------------------------------------------------------------------------------------------------------------------------------------------------------------------------------------------------------------------------------------------------------------------------------------------------------------------------------------------|
| 38779318505, 38779318506, 38779318509, 39769001210, 39769001240, 39769001290, 39822210001, 39822210002, 39822212001, 39822218001, 39822220001, 41616017640, 41616017840, 42023014901, 42023017204, 42023017204, 42023017204, 42238011101, 42238011112, 42254011030, 42291007101, 42291007101, 42291016660, 42291016712, 42291019060, 42291019112, 42291042030, 42291042030, 42291042130, 42291042130, 42291050501, 42291059401, 42291075201, 42291075201, 42291075301, 42291075301, 42291075401, 42291075401, 42291084301, 42292000701, 42292000710, 42367012121, 42367012125, 42367012129, 42367053133, 42658001001, 42852000114, 42852000115, 42852000116, 42852000117, 42852000121, 42852000124, 42852000127, 42852000128, 42852000130, 43063043930, 43066000101, 43066000601, 43066001001, 43066001401, 43066001801, 43353017809, 43353017809, 43353017853, 43353017853, 43353017860, 43353017860, 43353017880, 43353017880, 43353031709, 43353031709, 43353031716, 43353031716, 43353031753, 43353031753, 43353031770, 43353031770, 43353031780, 43353031780, 43353068609, 43353068609, 43353068660, 43353068660, 43353074509, 43353074509, 43353074560, 43353074560, 43598002748, 43598002950, 43598025811, 43598025940, 43598030562, 43598030920, 43598034837, 43598038957, 43598039150, 43598039248, 43598042737, 43598046562, 43598061040, 43598061111, 43598062857, 43598065011, 43598067811, 43598086111, 43598086560, 43975025205, 43975025214, 43975025305, 43975025314, 43975025405, 43975025414, 43975025505, 43975025514, 43975025605, 43975025614, 43975025705, 43975030710, 43975030810, 43975031510, 44087002203, 44087002209, 44087004403, 44087004409, 44087018801, 44087040004, 44087040005, 44087040006, 44087040007, 44087040008, 44087040009, 44087040010, 44087332201, 44087332209, 44087334401, 44087334409, 44087400000, 44087400004, 44087400005, 44087400006, 44087400007, 44087400008, 44087400009, 44087882201, 44567050501, 44567050601, 44567050701, 44567050901, 44567051001, 44567051101, 44567053001, 45963061153, 45963061159, 45963061353, 45963061356, 45963061359, 45963061383, 45963061386, 45963061389, 45963063749, 45963063858, 45963064057, 45963064077, 45963068602, 45963068749, 45963073452, 45963073454, 45963073474, 45963076552, 45963079056, 46026098301, 46144015705, 46144015801, 46144015825, 46144032325, 46144032325, 47335004640, 47335004740, 47335015040, 47335015140, 47335017640, 47335017840, 47335023583, 47335023596, 47335028440, 47335028541, 47335028641, 47335030040, 47335032340, 47335036140, 47335036141, 47335089021, 47335089060, 47335089072, 47335089074, 47335089080, 47335089121, 47335089160, 47335089172, 47335089174, 47335089180, 47335089221, 47335089260, 47335089272, 47335089274, 47335089280, 47335089360, 47335089374, 47335089380, 47335089540, 47335092921, 47335092960, 47335092972, 47335092974, 47335092980, 47335093021, 47335093060, 47335093072, 47335093074, 47335093080, 47335093940, 47781020050, 47781059122, 47781059229, 47781059307, 47781059407, 47781059507, 47781060320, 47781060427, 47781060594, 47781060694, 47781060925, 47781061023, 48818000101, 48818000102, 49401008801, 49401008801, 49401008835, 49401008835, 49401008842, 49401008842, 49401008847, 49401008847, 49401010101, 49401010101, 49401010201, 49401010201, 49452073501, 49452073502, 49452078201, 49452078201, 49452078202, 49452078202, 49452078203, 49452078203, 49452078301, 49452078301, 49452078302, 49452078302, 49452078303, 49452078303, 49452078303, 49452078304, 49452078304, 49452078305, 49452078305, 49452191101, 49452191102, 49452191104, 49452207802, 49452207803, 49452241102, 49452241102, 49452317501, 49452317502, 49452317503, 49452317504, 49452317505, 49452446302, 49452460001, 49452460002, 49452460003, 49452460101, 49452460102, 49452460103, 49452460104, 49452478604, 49771000201, 49771000203, 49884011952, 49884011991, 49884012552, 49884012591, 49884012752, 49884012791, 49884028302, 49884028352, 49884088805, 49884088805, 49884088811, 49884088811, 49884088905, 49884088905, 49884088911, 49884088911, 49884092202, 49884092204, 49999038024, 49999038036, 49999093600, 49999093600, |
|------------------------------------------------------------------------------------------------------------------------------------------------------------------------------------------------------------------------------------------------------------------------------------------------------------------------------------------------------------------------------------------------------------------------------------------------------------------------------------------------------------------------------------------------------------------------------------------------------------------------------------------------------------------------------------------------------------------------------------------------------------------------------------------------------------------------------------------------------------------------------------------------------------------------------------------------------------------------------------------------------------------------------------------------------------------------------------------------------------------------------------------------------------------------------------------------------------------------------------------------------------------------------------------------------------------------------------------------------------------------------------------------------------------------------------------------------------------------------------------------------------------------------------------------------------------------------------------------------------------------------------------------------------------------------------------------------------------------------------------------------------------------------------------------------------------------------------------------------------------------------------------------------------------------------------------------------------------------------------------------------------------------------------------------------------------------------------------------------------------------------------------------------------------------------------------------------------------------------------------------------------------------------------------------------------------------------------------------------------------------------------------------------------------------------------------------------------------------------------------------------------------------------------------------------------------------------------------------------------------------------------------------------------------------------------------------------------------------------------------------------------------------------------------------------------------------------------------------------------------------------------------------------------------------------------------------------------------------------------------------------------------------------------------------------------------------------------------------------------------------------------------------------------------------------------------------------------------------------------------------------------------------------------------------------------------------------------------------------------------------------------------------------------------------------------------------------------------------------------------------------------------------------------------------------------------------------------------------------------------------------------------------------------------------------------------------------------------------------------------------------------------------------------------------------------------------------------------------------------------------------------------------------------------------------------------------------------------------------------------------------------------------------------------------------------------------------------------------------------------------------------------------------------------------------------------------------------|

|                                                                                                                                                                                                                                                                                                                                                                                                                                                                                                                                                                                                                                                                                                                                                                                                                                                                                                                                                                                                                                                                                                                                                                                                                                                                                                                                                                                                                                                                                                                                                                                                                                                                                                                                                                                                                                                                                                                                                                                                                                                                                                                                                                                                                                                                                                                                                                                                                                                                                                                                                                                                                                                                                                                                                                                                                                                                                                                                                                                                                                                                                                                                                                                                                                                                                                                                                                                                                                                                                                                                                                                                                                                                                                                                                                                                                                                                                                                                                                                                                                                                                                                                                                                                            |
|------------------------------------------------------------------------------------------------------------------------------------------------------------------------------------------------------------------------------------------------------------------------------------------------------------------------------------------------------------------------------------------------------------------------------------------------------------------------------------------------------------------------------------------------------------------------------------------------------------------------------------------------------------------------------------------------------------------------------------------------------------------------------------------------------------------------------------------------------------------------------------------------------------------------------------------------------------------------------------------------------------------------------------------------------------------------------------------------------------------------------------------------------------------------------------------------------------------------------------------------------------------------------------------------------------------------------------------------------------------------------------------------------------------------------------------------------------------------------------------------------------------------------------------------------------------------------------------------------------------------------------------------------------------------------------------------------------------------------------------------------------------------------------------------------------------------------------------------------------------------------------------------------------------------------------------------------------------------------------------------------------------------------------------------------------------------------------------------------------------------------------------------------------------------------------------------------------------------------------------------------------------------------------------------------------------------------------------------------------------------------------------------------------------------------------------------------------------------------------------------------------------------------------------------------------------------------------------------------------------------------------------------------------------------------------------------------------------------------------------------------------------------------------------------------------------------------------------------------------------------------------------------------------------------------------------------------------------------------------------------------------------------------------------------------------------------------------------------------------------------------------------------------------------------------------------------------------------------------------------------------------------------------------------------------------------------------------------------------------------------------------------------------------------------------------------------------------------------------------------------------------------------------------------------------------------------------------------------------------------------------------------------------------------------------------------------------------------------------------------------------------------------------------------------------------------------------------------------------------------------------------------------------------------------------------------------------------------------------------------------------------------------------------------------------------------------------------------------------------------------------------------------------------------------------------------------------------|
| 49999093600, 49999093630, 49999093630, 49999093630, 49999093730, 49999093730, 49999093730, 50090029409, 50090224500, 50090224500, 50090234509, 50090341802, 50111088542, 50111088542, 50111090943, 50111090943, 50111092043, 50111092043, 50111096576, 50111096676, 50111096776, 50242005110, 50242005121, 50242005214, 50242005223, 50242005306, 50242005656, 50242006001, 50242006002, 50242006010, 50242006101, 50242006110, 50242007701, 50242008701, 50242008801, 50242010801, 50242010901, 50242013201, 50242013210, 50242013460, 50242013468, 50242013501, 50242013501, 50242013601, 50242013601, 50242013701, 50242013701, 50242013801, 50242013801, 50242013886, 50242013886, 50242014301, 50242014301, 50242014501, 50242024501, 50242024501, 50242026001, 50242026001, 50268015411, 50268015413, 50268047711, 50268047711, 50268047715, 50268047715, 50268047811, 50268047811, 50268047815, 50268047815, 50268052711, 50268052715, 50268055911, 50268055911, 50268055911, 50268055912, 50268055912, 50268056011, 50268056011, 50268056011, 50268056012, 50268056012, 50268056012, 50268058111, 50268058111, 50268058111, 50268058115, 50268058115, 50268058115, 50268071811, 50268071811, 50268071813, 50268071813, 50268076111, 50268076112, 50268076211, 50268076212, 50268076311, 50268076312, 50419000201, 50419000233, 50419005014, 50419005030, 50419035510, 50419035512, 50419035703, 50419052101, 50419052103, 50419052105, 50419052115, 50419052201, 50419052309, 50419052315, 50419052325, 50419052335, 50419052401, 50419052435, 50419059501, 50419059505, 50474070062, 50474070062, 50474071079, 50474071079, 50474071081, 50474071081, 50742020701, 50742020701, 50742020801, 50742020801, 50742020901, 50742020901, 50742040510, 50742040620, 50742042802, 50742043001, 50742043108, 50742043810, 50742044505, 50742044615, 50742044745, 50742044860, 50742046316, 50742051220, 50742051902, 50742052005, 50742052110, 50881000560, 50881001060, 50881001560, 50881002060, 50881002560, 51079002801, 51079002801, 51079002820, 51079002820, 51079037901, 51079037901, 51079037901, 51079037920, 51079037920, 51079037920, 51079050801, 51079050801, 51079050801, 51079050820, 51079050820, 51079050820, 51079050901, 51079050901, 51079050901, 51079050920, 51079050920, 51079050920, 51079051001, 51079051005, 51079062001, 51079062001, 51079062006, 51079062006, 51079067001, 51079067005, 51079067086, 51079067087, 51079067088, 51079067089, 51079072101, 51079072101, 51079072101, 51079072120, 51079072120, 51079072120, 51079081701, 51079081701, 51079081720, 51079081720, 51079081801, 51079081801, 51079081820, 51079081820, 51079096101, 51079096201, 51079096301, 51079096501, 51079096505, 51144005001, 51285036601, 51285036701, 51285036801, 51285036901, 51285050902, 51309020410, 51309020420, 51309020520, 51309020530, 51309020605, 51309020610, 51309020615, 51309020705, 51309020710, 51309020715, 51309020720, 51309020830, 51309021710, 51309021720, 51309021750, 51309021798, 51309022720, 51309022720, 51309023110, 51309023210, 51407009560, 51407009612, 51407012101, 51407018201, 51407018201, 51432040910, 51432047010, 51432052203, 51552066301, 51552066301, 51552066302, 51552066302, 51552066304, 51552066304, 51552066304, 51552066305, 51552066305, 51552066306, 51552066306, 51552066306, 51552066309, 51552066309, 51552073301, 51552073302, 51552073304, 51552073305, 51552077902, 51552077902, 51552077904, 51552077904, 51552077905, 51552077905, 51552105401, 51552105409, 51552112801, 51552112801, 51552112804, 51552112804, 51552112805, 51552112805, 51552112806, 51552112806, 51552140302, 51552140302, 51862008314, 51862008351, 51862008414, 51862008451, 51862008514, 51862008551, 51862008614, 51862008651, 51862008714, 51862008751, 51862008851, 51862045801, 51862045801, 51862045847, 51862045847, 51862046001, 51862046001, 51862046047, 51862046047, 51927108500, 51927144100, 51927156500, 51927200000, 51927217700, 51927225800, 51927225800, 51927276200, 51927277200, 51927280300, 51927319600, 51927319600, 51927355700, 51927355700, 51927364200, 51927382600, 51927442100, 51927446700, 51927487100, 51927492400, |
|------------------------------------------------------------------------------------------------------------------------------------------------------------------------------------------------------------------------------------------------------------------------------------------------------------------------------------------------------------------------------------------------------------------------------------------------------------------------------------------------------------------------------------------------------------------------------------------------------------------------------------------------------------------------------------------------------------------------------------------------------------------------------------------------------------------------------------------------------------------------------------------------------------------------------------------------------------------------------------------------------------------------------------------------------------------------------------------------------------------------------------------------------------------------------------------------------------------------------------------------------------------------------------------------------------------------------------------------------------------------------------------------------------------------------------------------------------------------------------------------------------------------------------------------------------------------------------------------------------------------------------------------------------------------------------------------------------------------------------------------------------------------------------------------------------------------------------------------------------------------------------------------------------------------------------------------------------------------------------------------------------------------------------------------------------------------------------------------------------------------------------------------------------------------------------------------------------------------------------------------------------------------------------------------------------------------------------------------------------------------------------------------------------------------------------------------------------------------------------------------------------------------------------------------------------------------------------------------------------------------------------------------------------------------------------------------------------------------------------------------------------------------------------------------------------------------------------------------------------------------------------------------------------------------------------------------------------------------------------------------------------------------------------------------------------------------------------------------------------------------------------------------------------------------------------------------------------------------------------------------------------------------------------------------------------------------------------------------------------------------------------------------------------------------------------------------------------------------------------------------------------------------------------------------------------------------------------------------------------------------------------------------------------------------------------------------------------------------------------------------------------------------------------------------------------------------------------------------------------------------------------------------------------------------------------------------------------------------------------------------------------------------------------------------------------------------------------------------------------------------------------------------------------------------------------------------------------|

|                                                                                                                                                                                                                                                                                                                                                                                                                                                                                                                                                                                                                                                                                                                                                                                                                                                                                                                                                                                                                                                                                                                                                                                                                                                                                                                                                                                                                                                                                                                                                                                                                                                                                                                                                                                                                                                                                                                                                                                                                                                                                                                                                                                                                                                                                                                                                                                                                                                                                                                                                                                                                                                                                                                                                                                                                                                                                                                                                                                                                                                                                                                                                                                                                                                                                                                                                                                                                                                                                                                                                                                                                                                                                                                                                                                                                                                                                                                                                                                                                                                                                                                                                                                                            |
|------------------------------------------------------------------------------------------------------------------------------------------------------------------------------------------------------------------------------------------------------------------------------------------------------------------------------------------------------------------------------------------------------------------------------------------------------------------------------------------------------------------------------------------------------------------------------------------------------------------------------------------------------------------------------------------------------------------------------------------------------------------------------------------------------------------------------------------------------------------------------------------------------------------------------------------------------------------------------------------------------------------------------------------------------------------------------------------------------------------------------------------------------------------------------------------------------------------------------------------------------------------------------------------------------------------------------------------------------------------------------------------------------------------------------------------------------------------------------------------------------------------------------------------------------------------------------------------------------------------------------------------------------------------------------------------------------------------------------------------------------------------------------------------------------------------------------------------------------------------------------------------------------------------------------------------------------------------------------------------------------------------------------------------------------------------------------------------------------------------------------------------------------------------------------------------------------------------------------------------------------------------------------------------------------------------------------------------------------------------------------------------------------------------------------------------------------------------------------------------------------------------------------------------------------------------------------------------------------------------------------------------------------------------------------------------------------------------------------------------------------------------------------------------------------------------------------------------------------------------------------------------------------------------------------------------------------------------------------------------------------------------------------------------------------------------------------------------------------------------------------------------------------------------------------------------------------------------------------------------------------------------------------------------------------------------------------------------------------------------------------------------------------------------------------------------------------------------------------------------------------------------------------------------------------------------------------------------------------------------------------------------------------------------------------------------------------------------------------------------------------------------------------------------------------------------------------------------------------------------------------------------------------------------------------------------------------------------------------------------------------------------------------------------------------------------------------------------------------------------------------------------------------------------------------------------------------------|
| 51927492400, 51927512500, 51927512500, 51927512500, 51991021898, 51991021998, 51991037960, 51991037999, 51991038060, 51991038099, 51991038160, 51991038199, 51991079798, 51991082128, 51991082199, 51991082228, 51991082299, 51991082328, 51991082399, 51991082428, 51991082499, 51991092298, 51991092398, 51991093698, 51991093798, 51991093898, 52372060901, 52372060901, 52372060902, 52372060902, 52372060903, 52372060903, 52372072801, 52372072801, 52372072802, 52372072802, 52372072803, 52372072803, 52372072804, 52372072804, 52372084201, 52372084202, 52372084203, 52609000105, 52609300100, 52609300200, 52652200101, 52652200106, 52959007900, 52959007900, 52959024400, 53002048600, 53002048600, 53002048720, 53258148004, 53258149004, 53258152004, 53258171003, 53258171100, 53258197001, 53258197002, 53258197003, 53258227003, 53258228004, 53258288003, 53258288030, 53443000321, 53443000322, 53443000324, 53443058232, 53905003110, 53905003210, 53905003310, 53905003410, 53905011110, 53905025101, 53905025201, 53905029101, 53905099101, 53905099101, 53905099110, 53905099110, 53964000101, 53964000202, 54288010601, 54288010902, 54288013201, 54288013201, 54288013501, 54288013501, 54436001002, 54436001004, 54436001202, 54436001204, 54436001502, 54436001504, 54436001702, 54436001704, 54436002002, 54436002004, 54436002202, 54436002204, 54436002502, 54436002504, 54436007502, 54436007504, 54482030101, 54569037200, 54569037201, 54569037202, 54569037203, 54569037300, 54569037301, 54569037400, 54569037500, 54569037501, 54569037502, 54569140000, 54569140700, 54569146600, 54569155000, 54569181800, 54569181801, 54569181802, 54569181803, 54569181809, 54569184601, 54569216900, 54569216900, 54569216901, 54569216901, 54569256300, 54569256300, 54569287200, 54569287200, 54569287200, 54569287300, 54569287300, 54569296300, 54569415200, 54569443300, 54569452500, 54569482400, 54569531600, 54569542700, 54569549100, 54569549200, 54569552400, 54569552400, 54569571200, 54569571300, 54569571700, 54569571800, 54746000101, 54766009306, 54766059010, 54766059010, 54868017301, 54868092101, 54868092101, 54868092102, 54868092102, 54868092104, 54868092104, 54868112600, 54868112601, 54868112602, 54868112603, 54868112604, 54868112605, 54868231900, 54868231900, 54868252200, 54868305000, 54868308500, 54868318800, 54868334100, 54868382600, 54868382601, 54868382602, 54868382603, 54868382604, 54868382605, 54868382606, 54868382607, 54868382608, 54868382609, 54868414200, 54868414201, 54868414202, 54868414204, 54868414205, 54868414206, 54868414300, 54868414301, 54868414302, 54868433900, 54868433901, 54868433902, 54868433903, 54868433904, 54868438500, 54868438500, 54868471600, 54868478200, 54868478200, 54868479600, 54868482200, 54868482200, 54868488700, 54868488700, 54868488701, 54868488701, 54868490200, 54868490200, 54868500500, 54868500501, 54868502000, 54868503600, 54868503600, 54868503601, 54868503601, 54868521800, 54868521801, 54868521802, 54868522900, 54868522900, 54868526000, 54868526001, 54868526002, 54868526003, 54868526004, 54868526005, 54868526006, 54868526007, 54868526008, 54868526009, 54868528200, 54868528201, 54868528202, 54868531000, 54868531000, 54868531001, 54868531001, 54868531002, 54868531002, 54868531003, 54868531003, 54868531004, 54868531004, 54868531006, 54868531006, 54868534800, 54868534801, 54868535000, 54868535001, 54868535002, 54868535003, 54868535004, 54868535400, 54868535500, 54868535502, 54868544400, 54868544400, 54868552200, 54868552200, 54868559600, 54868559600, 54868575900, 54868598000, 54868617000, 54868617000, 54868623200, 54868623200, 54879001413, 54879002101, 54879002201, 54879002351, 54879002710, 54879003664, 55111049660, 55111049704, 55111052501, 55111052501, 55111052601, 55111052601, 55111052701, 55111052701, 55111055610, 55111065301, 55111065301, 55111065401, 55111065401, 55150027001, 55150027101, 55150033101, 55150033201, 55150033501, 55150037601, 55150037801, 55150037901, 55150038001, 55150038601, 55289092430, 55292081155, 55390003010, 55390003110, 55390003210, 55390003310, 55390003410, 55390009010, |
|------------------------------------------------------------------------------------------------------------------------------------------------------------------------------------------------------------------------------------------------------------------------------------------------------------------------------------------------------------------------------------------------------------------------------------------------------------------------------------------------------------------------------------------------------------------------------------------------------------------------------------------------------------------------------------------------------------------------------------------------------------------------------------------------------------------------------------------------------------------------------------------------------------------------------------------------------------------------------------------------------------------------------------------------------------------------------------------------------------------------------------------------------------------------------------------------------------------------------------------------------------------------------------------------------------------------------------------------------------------------------------------------------------------------------------------------------------------------------------------------------------------------------------------------------------------------------------------------------------------------------------------------------------------------------------------------------------------------------------------------------------------------------------------------------------------------------------------------------------------------------------------------------------------------------------------------------------------------------------------------------------------------------------------------------------------------------------------------------------------------------------------------------------------------------------------------------------------------------------------------------------------------------------------------------------------------------------------------------------------------------------------------------------------------------------------------------------------------------------------------------------------------------------------------------------------------------------------------------------------------------------------------------------------------------------------------------------------------------------------------------------------------------------------------------------------------------------------------------------------------------------------------------------------------------------------------------------------------------------------------------------------------------------------------------------------------------------------------------------------------------------------------------------------------------------------------------------------------------------------------------------------------------------------------------------------------------------------------------------------------------------------------------------------------------------------------------------------------------------------------------------------------------------------------------------------------------------------------------------------------------------------------------------------------------------------------------------------------------------------------------------------------------------------------------------------------------------------------------------------------------------------------------------------------------------------------------------------------------------------------------------------------------------------------------------------------------------------------------------------------------------------------------------------------------------------------------------|

|                                                                                                                                                                                                                                                                                                                                                                                                                                                                                                                                                                                                                                                                                                                                                                                                                                                                                                                                                                                                                                                                                                                                                                                                                                                                                                                                                                                                                                                                                                                                                                                                                                                                                                                                                                                                                                                                                                                                                                                                                                                                                                                                                                                                                                                                                                                                                                                                                                                                                                                                                                                                                                                                                                                                                                                                                                                                                                                                                                                                                                                                                                                                                                                                                                                                                                                                                                                                                                                                                                                                                                                                                                                                                                                                                                                                                                                                                                                                                                                                                                                                                                                                                                                                                         |
|-------------------------------------------------------------------------------------------------------------------------------------------------------------------------------------------------------------------------------------------------------------------------------------------------------------------------------------------------------------------------------------------------------------------------------------------------------------------------------------------------------------------------------------------------------------------------------------------------------------------------------------------------------------------------------------------------------------------------------------------------------------------------------------------------------------------------------------------------------------------------------------------------------------------------------------------------------------------------------------------------------------------------------------------------------------------------------------------------------------------------------------------------------------------------------------------------------------------------------------------------------------------------------------------------------------------------------------------------------------------------------------------------------------------------------------------------------------------------------------------------------------------------------------------------------------------------------------------------------------------------------------------------------------------------------------------------------------------------------------------------------------------------------------------------------------------------------------------------------------------------------------------------------------------------------------------------------------------------------------------------------------------------------------------------------------------------------------------------------------------------------------------------------------------------------------------------------------------------------------------------------------------------------------------------------------------------------------------------------------------------------------------------------------------------------------------------------------------------------------------------------------------------------------------------------------------------------------------------------------------------------------------------------------------------------------------------------------------------------------------------------------------------------------------------------------------------------------------------------------------------------------------------------------------------------------------------------------------------------------------------------------------------------------------------------------------------------------------------------------------------------------------------------------------------------------------------------------------------------------------------------------------------------------------------------------------------------------------------------------------------------------------------------------------------------------------------------------------------------------------------------------------------------------------------------------------------------------------------------------------------------------------------------------------------------------------------------------------------------------------------------------------------------------------------------------------------------------------------------------------------------------------------------------------------------------------------------------------------------------------------------------------------------------------------------------------------------------------------------------------------------------------------------------------------------------------------------------------------|
| 55390009901, 55390011250, 55390011299, 55390011405, 55390011420, 55390011450, 55390011501, 55390012210, 55390012210, 55390012401, 55390013501, 55390014301, 55390015001, 55390015101, 55390015201, 55390015301, 55390015401, 55390015501, 55390015601, 55390018701, 55390022001, 55390022101, 55390022201, 55390024401, 55390025101, 55390025201, 55390025301, 55390029101, 55390029201, 55390029301, 55390030405, 55390030420, 55390030450, 55390031405, 55390031420, 55390031450, 55390033701, 55390033910, 55390041450, 55390041499, 55390043501, 55390045101, 55390045201, 55390045301, 55390049101, 55390049201, 55390049301, 55390051405, 55390051420, 55390051450, 55390060020, 55390060020, 55513013201, 55513014101, 55513017701, 55513017701, 55513017707, 55513017707, 55513017728, 55513017728, 55513019001, 55513019001, 55513019201, 55513019201, 55513020601, 55513020701, 55513020901, 55513020910, 55513020991, 55513022401, 55513032601, 55513034701, 55513034710, 55513034801, 55513034810, 55513052001, 55513052006, 55513053001, 55513053010, 55513054601, 55513054610, 55513055401, 55513055406, 55513056201, 55513056206, 55513067001, 55513067001, 55513071001, 55513073001, 55513092401, 55513092410, 55513092491, 55513092601, 55513092606, 55513092701, 55513092706, 55513095401, 55513095501, 55513095601, 55513095601, 55812024501, 55812024502, 55812024503, 57665000101, 57665000201, 57665000202, 57844052206, 57844052207, 57844052252, 57866902101, 57866902101, 57894003001, 57894003001, 57894005427, 57894006002, 57894006003, 57894006103, 57894007001, 57894007001, 57894007002, 57894007002, 57894007101, 57894007101, 57894007102, 57894007102, 57894016001, 57894016001, 57894035001, 57894035001, 57894042001, 57894042101, 57902024901, 57902024905, 57962001428, 57962007028, 57962014009, 57962014012, 57962028028, 57962042028, 57962056028, 58016067860, 58063010001, 58063060050, 58181303005, 58181303105, 58181303205, 58181304005, 58181304105, 58181304205, 58181304305, 58406000101, 58406000135, 58406000201, 58406000233, 58406001001, 58406001001, 58406001004, 58406001004, 58406002101, 58406002101, 58406002104, 58406002104, 58406003201, 58406003201, 58406003204, 58406003204, 58406004401, 58406004401, 58406004404, 58406004404, 58406005014, 58406005030, 58406005501, 58406005501, 58406005504, 58406005504, 58406042534, 58406042534, 58406042541, 58406042541, 58406043501, 58406043501, 58406043504, 58406043504, 58406044501, 58406044501, 58406044504, 58406044504, 58406045501, 58406045501, 58406045504, 58406045504, 58406045601, 58406045601, 58406045604, 58406045604, 58406066102, 58406066131, 58406066201, 58406066236, 58406067101, 58406067103, 58406067105, 58406067301, 58406068114, 58406068117, 58406068312, 58406068315, 58406068316, 58406068318, 58406071112, 58406071418, 58468010001, 58468010002, 58468018002, 58468018101, 58468018102, 58468020001, 58468035701, 58468035703, 58469399830, 58597802901, 58597802901, 58597802902, 58597802902, 58597802903, 58597802903, 58597802904, 58597802904, 58597802905, 58597802905, 58597802906, 58597802906, 58597863601, 58597863601, 58597863602, 58597863602, 58597863603, 58597863603, 58597863603, 59075073015, 59137050500, 59137050504, 59137051000, 59137051004, 59137051500, 59137051504, 59137052000, 59137052004, 59137052500, 59137052504, 59137053000, 59137053001, 59137053004, 59137053500, 59137053504, 59137054000, 59137054004, 59137054500, 59137054504, 59137055000, 59137055004, 59148004670, 59148004790, 59148004791, 59148007090, 59148007091, 59148007191, 59310061031, 59310061033, 59572010201, 59572010511, 59572010512, 59572010513, 59572010592, 59572010593, 59572020514, 59572020517, 59572020594, 59572020597, 59572021015, 59572021095, 59572021513, 59572021593, 59572022016, 59572022096, 59572030101, 59572030250, 59572040200, 59572040228, 59572040500, 59572040528, 59572040530, 59572041000, 59572041028, 59572041030, 59572041500, 59572041521, 59572042000, 59572042021, 59572042500, 59572042521, 59572042525, 59572073007, 59572073014, 59572074007, 59572074014, 59572096110, 59572096210, 59572098301, 59572098401, 59627000103, |
|-------------------------------------------------------------------------------------------------------------------------------------------------------------------------------------------------------------------------------------------------------------------------------------------------------------------------------------------------------------------------------------------------------------------------------------------------------------------------------------------------------------------------------------------------------------------------------------------------------------------------------------------------------------------------------------------------------------------------------------------------------------------------------------------------------------------------------------------------------------------------------------------------------------------------------------------------------------------------------------------------------------------------------------------------------------------------------------------------------------------------------------------------------------------------------------------------------------------------------------------------------------------------------------------------------------------------------------------------------------------------------------------------------------------------------------------------------------------------------------------------------------------------------------------------------------------------------------------------------------------------------------------------------------------------------------------------------------------------------------------------------------------------------------------------------------------------------------------------------------------------------------------------------------------------------------------------------------------------------------------------------------------------------------------------------------------------------------------------------------------------------------------------------------------------------------------------------------------------------------------------------------------------------------------------------------------------------------------------------------------------------------------------------------------------------------------------------------------------------------------------------------------------------------------------------------------------------------------------------------------------------------------------------------------------------------------------------------------------------------------------------------------------------------------------------------------------------------------------------------------------------------------------------------------------------------------------------------------------------------------------------------------------------------------------------------------------------------------------------------------------------------------------------------------------------------------------------------------------------------------------------------------------------------------------------------------------------------------------------------------------------------------------------------------------------------------------------------------------------------------------------------------------------------------------------------------------------------------------------------------------------------------------------------------------------------------------------------------------------------------------------------------------------------------------------------------------------------------------------------------------------------------------------------------------------------------------------------------------------------------------------------------------------------------------------------------------------------------------------------------------------------------------------------------------------------------------------------------------|

|                                                                                                                                                                                                                                                                                                                                                                                                                                                                                                                                                                                                                                                                                                                                                                                                                                                                                                                                                                                                                                                                                                                                                                                                                                                                                                                                                                                                                                                                                                                                                                                                                                                                                                                                                                                                                                                                                                                                                                                                                                                                                                                                                                                                                                                                                                                                                                                                                                                                                                                                                                                                                                                                                                                                                                                                                                                                                                                                                                                                                                                                                                                                                                                                                                                                                                                                                                                                                                                                                                                                                                                                                                                                                                                                                                                                                                                                                                                                                                                                                                                                                                                                                                                                            |
|------------------------------------------------------------------------------------------------------------------------------------------------------------------------------------------------------------------------------------------------------------------------------------------------------------------------------------------------------------------------------------------------------------------------------------------------------------------------------------------------------------------------------------------------------------------------------------------------------------------------------------------------------------------------------------------------------------------------------------------------------------------------------------------------------------------------------------------------------------------------------------------------------------------------------------------------------------------------------------------------------------------------------------------------------------------------------------------------------------------------------------------------------------------------------------------------------------------------------------------------------------------------------------------------------------------------------------------------------------------------------------------------------------------------------------------------------------------------------------------------------------------------------------------------------------------------------------------------------------------------------------------------------------------------------------------------------------------------------------------------------------------------------------------------------------------------------------------------------------------------------------------------------------------------------------------------------------------------------------------------------------------------------------------------------------------------------------------------------------------------------------------------------------------------------------------------------------------------------------------------------------------------------------------------------------------------------------------------------------------------------------------------------------------------------------------------------------------------------------------------------------------------------------------------------------------------------------------------------------------------------------------------------------------------------------------------------------------------------------------------------------------------------------------------------------------------------------------------------------------------------------------------------------------------------------------------------------------------------------------------------------------------------------------------------------------------------------------------------------------------------------------------------------------------------------------------------------------------------------------------------------------------------------------------------------------------------------------------------------------------------------------------------------------------------------------------------------------------------------------------------------------------------------------------------------------------------------------------------------------------------------------------------------------------------------------------------------------------------------------------------------------------------------------------------------------------------------------------------------------------------------------------------------------------------------------------------------------------------------------------------------------------------------------------------------------------------------------------------------------------------------------------------------------------------------------------------------|
| 59627000104, 59627000205, 59627000206, 59627000207, 59627000301, 59627000304, 59627011103, 59627011104, 59627022205, 59627033304, 59651018201, 59651020460, 59651020508, 59651034830, 59651034830, 59651034930, 59651034930, 59676020101, 59762070201, 59762070201, 59762070201, 59762070203, 59762070203, 59762070203, 59762070301, 59762070301, 59762070301, 59762070302, 59762070302, 59762070302, 59762070302, 59762070303, 59762070303, 59762070303, 59762100101, 59762100101, 59762100201, 59762100201, 59762100301, 59762100301, 59762100301, 59762120504, 59762120504, 59762120506, 59762120506, 59911587401, 59923070305, 59923070414, 59923070505, 59923070614, 59923070705, 59923070814, 59923070905, 59923071014, 59923071105, 59923071214, 59923071305, 59923072160, 59923072212, 60219107601, 60219107601, 60219107601, 60219203601, 60219203601, 60219203701, 60219203701, 60311045001, 60429001612, 60429001612, 60429001712, 60429001712, 60429001712, 60429005901, 60429005901, 60429005901, 60429005905, 60429005905, 60429005905, 60429007001, 60429007001, 60429007001, 60429007005, 60429007005, 60429007005, 60429008036, 60429031930, 60429031930, 60429032030, 60429032030, 60429037701, 60429037701, 60429037801, 60429037801, 60429037901, 60429037901, 60432014050, 60432014050, 60505013300, 60505013300, 60505013400, 60505013400, 60505035401, 60505035401, 60505250201, 60505250201, 60505250203, 60505250203, 60505250301, 60505250301, 60505250303, 60505250303, 60505296507, 60505296507, 60505296507, 60505296607, 60505296607, 60505296607, 60505296701, 60505296701, 60505296701, 60505296705, 60505296705, 60505296705, 60505296707, 60505296707, 60505296801, 60505296801, 60505296801, 60505296805, 60505296805, 60505296805, 60505296807, 60505296807, 60505463003, 60505463003, 60505463103, 60505463103, 60505463203, 60505463203, 60505603500, 60505603506, 60505603700, 60505603706, 60505613206, 60505613207, 60505613208, 60505616600, 60505617700, 60505617708, 60505619702, 60505619702, 60553011110, 60574411101, 60574411201, 60574411301, 60574411401, 60687014911, 60687014994, 60687043801, 60687043801, 60687043801, 60687043811, 60687043811, 60687043811, 60687049401, 60687049401, 60687049401, 60687049411, 60687049411, 60687049411, 60951073470, 60951073470, 60951073470, 60951073485, 60951073485, 60951073485, 60951073570, 60951073570, 60951073570, 60951073570, 60951073585, 60951073585, 60951073585, 60966013304, 60966023303, 60966033302, 60966043301, 60976059755, 60976059755, 60976059871, 60976059871, 61269041020, 61314030401, 61314030410, 61314031201, 61314031210, 61314031801, 61314031805, 61314031810, 61314032601, 61314032605, 61314032610, 61314086601, 61314086601, 61379010001, 61703030650, 61703032722, 61703033109, 61703033918, 61703033922, 61703033950, 61703033956, 61703033961, 61703033962, 61703033963, 61703034209, 61703034222, 61703034250, 61703035009, 61703035010, 61703035037, 61703035038, 61703036018, 61703036022, 61703036050, 61703036135, 61703036250, 61703036318, 61703036322, 61703040707, 61703040732, 61703040804, 61703040807, 61703040813, 61703040822, 61703040825, 61703040832, 61703040841, 61703040858, 61703040932, 61703040953, 61703040967, 61755000101, 62053053905, 62053053905, 62157081401, 62161000538, 62175038037, 62175038037, 62175038137, 62175038137, 62175038237, 62175038237, 62332006130, 62332006130, 62332006230, 62332006230, 62484000202, 62484000201, 62484000202, 62559092014, 62559092051, 62559092114, 62559092151, 62559092214, 62559092251, 62559092314, 62559092351, 62559092414, 62559092451, 62559092551, 62559093001, 62559093101, 62584078201, 62584082711, 62584082711, 62584082721, 62584082721, 62701080001, 62701094036, 62701094099, 62756023886, 62756023920, 62856017708, 62856060001, 62856060210, 62991120001, 62991120002, 62991120004, 62991148601, 62991148602, 62991148603, 62991148604, 62991153301, 62991153301, 62991153302, 62991153302, 62991153305, 62991153305, 62991154501, 62991154502, 62991154503, 62991218901, 62991218901, 62991218903, 62991218903, 62991218904, 62991218904, 62991260401, 62991260402, 62991260403, |
|------------------------------------------------------------------------------------------------------------------------------------------------------------------------------------------------------------------------------------------------------------------------------------------------------------------------------------------------------------------------------------------------------------------------------------------------------------------------------------------------------------------------------------------------------------------------------------------------------------------------------------------------------------------------------------------------------------------------------------------------------------------------------------------------------------------------------------------------------------------------------------------------------------------------------------------------------------------------------------------------------------------------------------------------------------------------------------------------------------------------------------------------------------------------------------------------------------------------------------------------------------------------------------------------------------------------------------------------------------------------------------------------------------------------------------------------------------------------------------------------------------------------------------------------------------------------------------------------------------------------------------------------------------------------------------------------------------------------------------------------------------------------------------------------------------------------------------------------------------------------------------------------------------------------------------------------------------------------------------------------------------------------------------------------------------------------------------------------------------------------------------------------------------------------------------------------------------------------------------------------------------------------------------------------------------------------------------------------------------------------------------------------------------------------------------------------------------------------------------------------------------------------------------------------------------------------------------------------------------------------------------------------------------------------------------------------------------------------------------------------------------------------------------------------------------------------------------------------------------------------------------------------------------------------------------------------------------------------------------------------------------------------------------------------------------------------------------------------------------------------------------------------------------------------------------------------------------------------------------------------------------------------------------------------------------------------------------------------------------------------------------------------------------------------------------------------------------------------------------------------------------------------------------------------------------------------------------------------------------------------------------------------------------------------------------------------------------------------------------------------------------------------------------------------------------------------------------------------------------------------------------------------------------------------------------------------------------------------------------------------------------------------------------------------------------------------------------------------------------------------------------------------------------------------------------------------------------|



|                                                                                                                                                                                                                                                                                                                                                                                                                                                                                                                                                                                                                                                                                                                                                                                                                                                                                                                                                                                                                                                                                                                                                                                                                                                                                                                                                                                                                                                                                                                                                                                                                                                                                                                                                                                                                                                                                                                                                                                                                                                                                                                                                                                                                                                                                                                                                                                                                                                                                                                                                                                                                                                                                                                                                                                                                                                                                                                                                                                                                                                                                                                                                                                                                                                                                                                                                                                                                                                                                                                                                                                                                                                                                                                                                                                                                                                                                                                                                                                                                                                                                                                                                                     |
|---------------------------------------------------------------------------------------------------------------------------------------------------------------------------------------------------------------------------------------------------------------------------------------------------------------------------------------------------------------------------------------------------------------------------------------------------------------------------------------------------------------------------------------------------------------------------------------------------------------------------------------------------------------------------------------------------------------------------------------------------------------------------------------------------------------------------------------------------------------------------------------------------------------------------------------------------------------------------------------------------------------------------------------------------------------------------------------------------------------------------------------------------------------------------------------------------------------------------------------------------------------------------------------------------------------------------------------------------------------------------------------------------------------------------------------------------------------------------------------------------------------------------------------------------------------------------------------------------------------------------------------------------------------------------------------------------------------------------------------------------------------------------------------------------------------------------------------------------------------------------------------------------------------------------------------------------------------------------------------------------------------------------------------------------------------------------------------------------------------------------------------------------------------------------------------------------------------------------------------------------------------------------------------------------------------------------------------------------------------------------------------------------------------------------------------------------------------------------------------------------------------------------------------------------------------------------------------------------------------------------------------------------------------------------------------------------------------------------------------------------------------------------------------------------------------------------------------------------------------------------------------------------------------------------------------------------------------------------------------------------------------------------------------------------------------------------------------------------------------------------------------------------------------------------------------------------------------------------------------------------------------------------------------------------------------------------------------------------------------------------------------------------------------------------------------------------------------------------------------------------------------------------------------------------------------------------------------------------------------------------------------------------------------------------------------------------------------------------------------------------------------------------------------------------------------------------------------------------------------------------------------------------------------------------------------------------------------------------------------------------------------------------------------------------------------------------------------------------------------------------------------------------------------------|
| 62991260404, 62991260405, 62991266401, 62991266401, 62991266402, 62991266402, 62991266403, 62991266403, 62991266404, 62991266404, 62991284901, 62991284902, 62991289901, 62991289902, 62991289903, 62991307201, 62991307201, 62991307202, 62991307202, 62991307203, 62991307203, 62991307204, 62991307204, 63020004901, 63020004904, 63032001160, 63275995605, 63275995608, 63275995609, 63275995801, 63275995801, 63275995802, 63275995802, 63275995806, 63275995806, 63275995807, 63275995807, 63307013101, 63307013101, 63307013105, 63307013105, 63307013111, 63307013111, 63307013115, 63307013115, 63307013137, 63307013137, 63307044101, 63307044101, 63307044105, 63307044105, 63307044109, 63307044109, 63307044111, 63307044111, 63323010351, 63323010364, 63323010365, 63323010391, 63323010395, 63323010401, 63323010405, 63323010425, 63323010450, 63323010465, 63323011700, 63323011701, 63323011710, 63323011718, 63323011719, 63323011720, 63323011728, 63323011731, 63323011741, 63323011751, 63323011758, 63323011759, 63323011761, 63323011768, 63323011769, 63323012102, 63323012104, 63323012108, 63323012110, 63323012140, 63323012250, 63323012259, 63323012302, 63323012310, 63323012710, 63323012812, 63323012820, 63323014010, 63323014210, 63323014212, 63323014507, 63323016610, 63323016720, 63323016721, 63323016800, 63323016905, 63323016915, 63323016945, 63323017205, 63323017215, 63323017245, 63323017260, 63323017420, 63323017460, 63323017530, 63323017650, 63323019020, 63323019120, 63323019140, 63323021110, 63323021220, 63323057270, 63323063703, 63323063710, 63323065010, 63323065017, 63323065020, 63323065027, 63323072110, 63323075010, 63323075020, 63323076020, 63323076120, 63323076305, 63323076306, 63323076316, 63323076317, 63323076350, 63323076352, 63323077139, 63323082520, 63370005710, 63370005710, 63370009515, 63370009525, 63370009535, 63370015410, 63370015415, 63370015425, 63459010310, 63459010450, 63459030343, 63459030547, 63459030741, 63459060001, 63459060010, 63459060106, 63459060111, 63459091001, 63459091011, 63459091012, 63459091015, 63459091017, 63459091018, 63459091036, 63459091201, 63459091211, 63459091212, 63459091215, 63459091217, 63459091218, 63459091236, 63459091853, 63459091859, 63459092053, 63459092059, 63629126301, 63629126301, 63629147201, 63629147202, 63629228501, 63629872301, 63629872301, 63629872501, 63629872501, 63629872601, 63629872601, 63629875201, 63739093211, 63739097117, 64116001101, 64116001112, 64116003101, 64116003106, 64116003124, 64116003901, 64116003906, 64116003924, 64365050201, 64380072006, 64380072006, 64380072106, 64380072106, 64380072206, 64380072206, 64380072506, 64380072506, 64380072506, 64380072507, 64380072507, 64380072606, 64380072606, 64380072607, 64380072607, 64380072607, 64406000801, 64406001101, 64406001101, 64406001102, 64406001102, 64406001201, 64406001201, 64406001501, 64406001501, 64406001502, 64406001502, 64406001601, 64406001601, 64406001701, 64406001701, 64406001702, 64406001702, 64679009601, 64679009602, 64842072709, 64980027606, 64980027712, 64980033305, 64980033314, 64980033405, 64980033414, 64980033505, 64980033514, 64980033605, 64980033614, 64980033705, 64980033714, 64980033805, 65162080114, 65162080151, 65162080214, 65162080251, 65162080314, 65162080351, 65162080414, 65162080451, 65162080514, 65162080551, 65162080651, 65162084306, 65162084416, 65219016001, 65219016010, 65219020005, 65219020005, 65219020005, 65219020005, 65219020505, 65219020505, 65219020505, 65219020505, 65483009306, 65483011607, 65483011607, 65483055101, 65483055101, 65483059010, 65483059010, 65597040601, 65649023141, 65649023141, 65649024141, 65649024141, 66220080711, 66220080722, 66220081011, 66220081022, 66220081211, 66220081222, 66220081511, 66220081522, 66220081711, 66220081722, 66220082011, 66220082022, 66220082211, 66220082222, 66220082511, 66220082522, 66435020115, 66435020195, 66435020196, 66435020199, 66435020209, 66435020295, 66479013501, 66479013509, 66479013611, 66479013613, 66479013619, 66479013721, 66479013929, 66479030110, |
|---------------------------------------------------------------------------------------------------------------------------------------------------------------------------------------------------------------------------------------------------------------------------------------------------------------------------------------------------------------------------------------------------------------------------------------------------------------------------------------------------------------------------------------------------------------------------------------------------------------------------------------------------------------------------------------------------------------------------------------------------------------------------------------------------------------------------------------------------------------------------------------------------------------------------------------------------------------------------------------------------------------------------------------------------------------------------------------------------------------------------------------------------------------------------------------------------------------------------------------------------------------------------------------------------------------------------------------------------------------------------------------------------------------------------------------------------------------------------------------------------------------------------------------------------------------------------------------------------------------------------------------------------------------------------------------------------------------------------------------------------------------------------------------------------------------------------------------------------------------------------------------------------------------------------------------------------------------------------------------------------------------------------------------------------------------------------------------------------------------------------------------------------------------------------------------------------------------------------------------------------------------------------------------------------------------------------------------------------------------------------------------------------------------------------------------------------------------------------------------------------------------------------------------------------------------------------------------------------------------------------------------------------------------------------------------------------------------------------------------------------------------------------------------------------------------------------------------------------------------------------------------------------------------------------------------------------------------------------------------------------------------------------------------------------------------------------------------------------------------------------------------------------------------------------------------------------------------------------------------------------------------------------------------------------------------------------------------------------------------------------------------------------------------------------------------------------------------------------------------------------------------------------------------------------------------------------------------------------------------------------------------------------------------------------------------------------------------------------------------------------------------------------------------------------------------------------------------------------------------------------------------------------------------------------------------------------------------------------------------------------------------------------------------------------------------------------------------------------------------------------------------------------------------------|

|                                                                                                                                                                                                                                                                                                                                                                                                                                                                                                                                                                                                                                                                                                                                                                                                                                                                                                                                                                                                                                                                                                                                                                                                                                                                                                                                                                                                                                                                                                                                                                                                                                                                                                                                                                                                                                                                                                                                                                                                                                                                                                                                                                                                                                                                                                                                                                                                                                                                                                                                                                                                                                                                                                                                                                                                                                                                                                                                                                                                                                                                                                                                                                                                                                                                                                                                                                                                                                                                                                                                                                                                                                                                                                                                                                                                                                                                                                                                                                                                                                                                                                                                                                                                                                                                                                                                                                                                                                                          |
|----------------------------------------------------------------------------------------------------------------------------------------------------------------------------------------------------------------------------------------------------------------------------------------------------------------------------------------------------------------------------------------------------------------------------------------------------------------------------------------------------------------------------------------------------------------------------------------------------------------------------------------------------------------------------------------------------------------------------------------------------------------------------------------------------------------------------------------------------------------------------------------------------------------------------------------------------------------------------------------------------------------------------------------------------------------------------------------------------------------------------------------------------------------------------------------------------------------------------------------------------------------------------------------------------------------------------------------------------------------------------------------------------------------------------------------------------------------------------------------------------------------------------------------------------------------------------------------------------------------------------------------------------------------------------------------------------------------------------------------------------------------------------------------------------------------------------------------------------------------------------------------------------------------------------------------------------------------------------------------------------------------------------------------------------------------------------------------------------------------------------------------------------------------------------------------------------------------------------------------------------------------------------------------------------------------------------------------------------------------------------------------------------------------------------------------------------------------------------------------------------------------------------------------------------------------------------------------------------------------------------------------------------------------------------------------------------------------------------------------------------------------------------------------------------------------------------------------------------------------------------------------------------------------------------------------------------------------------------------------------------------------------------------------------------------------------------------------------------------------------------------------------------------------------------------------------------------------------------------------------------------------------------------------------------------------------------------------------------------------------------------------------------------------------------------------------------------------------------------------------------------------------------------------------------------------------------------------------------------------------------------------------------------------------------------------------------------------------------------------------------------------------------------------------------------------------------------------------------------------------------------------------------------------------------------------------------------------------------------------------------------------------------------------------------------------------------------------------------------------------------------------------------------------------------------------------------------------------------------------------------------------------------------------------------------------------------------------------------------------------------------------------------------------------------------------------------------|
| <p>66479030110, 66591022141, 66591022141, 66591023141, 66591023141,<br/>66591024141, 66591024141, 66658011201, 66658011203, 66658011206,<br/>66658023001, 66658023101, 66658023401, 66658023401, 66658023407,<br/>66658023407, 66658023428, 66658023428, 66658050101, 66658050501,<br/>66658051001, 66689030708, 66689030708, 66689030708, 66689034702,<br/>66689034702, 66733094823, 66733095823, 66758004001, 66758004002,<br/>66758004008, 66758004101, 66758004301, 66758004302, 66758004303,<br/>66758004401, 66758004403, 66758004701, 66758004702, 66758004703,<br/>66758004704, 66758005001, 66758005002, 66758005003, 66758005301,<br/>66758005302, 66758095002, 66758095003, 66758095004, 66860010001,<br/>66860010101, 66860010201, 66993016030, 66993016030, 66993016130,<br/>66993016130, 66993048983, 67211010201, 67253032010, 67253032036,<br/>67253058042, 67253058043, 67253058044, 67253058045, 67253058046,<br/>67263037812, 67263037812, 67263037812, 67263037912, 67263037912,<br/>67263037912, 67263039601, 67263039601, 67263040701, 67263040701,<br/>67263040701, 67263056088, 67286005308, 67286005408, 67386041151,<br/>67386081155, 67457019350, 67457019501, 67457021501, 67457022102,<br/>67457022110, 67457022140, 67457025430, 67457031625, 67457038600,<br/>67457038600, 67457038600, 67457038681, 67457038681, 67457038681,<br/>67457042410, 67457042551, 67457042920, 67457043451, 67457044220,<br/>67457044360, 67457044917, 67457045010, 67457045110, 67457046610,<br/>67457046721, 67457046799, 67457046910, 67457047152, 67457047610,<br/>67457048040, 67457048508, 67457048599, 67457048604, 67457048699,<br/>67457049154, 67457049215, 67457049346, 67457049461, 67457051305,<br/>67457051399, 67457051805, 67457051920, 67457052040, 67457053102,<br/>67457053208, 67457053316, 67457054620, 67457057750, 67457057901,<br/>67457060820, 67457060920, 67457078108, 67457083306, 67457083306,<br/>67457084550, 67457084744, 67457089300, 67457089308, 67457092802,<br/>67457099115, 67457099620, 67457099740, 67544120553, 67544120553,<br/>67544120560, 67544120560, 67544120580, 67544120580, 67817006112,<br/>67817006312, 67817006612, 67817006712, 67877022501, 67877022501,<br/>67877022501, 67877022505, 67877022505, 67877022505, 67877023022,<br/>67877023022, 67877023022, 67877026601, 67877026601, 67877026601,<br/>67877026605, 67877026605, 67877026605, 67877027801, 67877027801,<br/>67877027901, 67877027901, 67877028001, 67877028001, 67877042612,<br/>67877042612, 67877042612, 67877042712, 67877042712, 67877042712,<br/>67877045860, 67877045912, 67877049301, 67877049301, 67877049305,<br/>67877049305, 67877053707, 67877053714, 67877053807, 67877053814,<br/>67877053907, 67877053914, 67877054007, 67877054014, 67877054107,<br/>67877054114, 67877054207, 67877071831, 67877071833, 67877071931,<br/>67877071933, 67877072031, 67877072033, 67877072131, 67877072133,<br/>67877074601, 67877074601, 67877074701, 67877074701, 67877074801,<br/>67877074801, 68001026522, 68001026523, 68001026524, 68001026525,<br/>68001026526, 68001026527, 68001026624, 68001026627, 68001026628,<br/>68001026629, 68001026630, 68001026631, 68001026632, 68001026633,<br/>68001028324, 68001028327, 68001028332, 68001028333, 68001031356,<br/>68001034128, 68001034129, 68001034136, 68001034137, 68001034728,<br/>68001034736, 68001037024, 68001037027, 68001037132, 68001037133,<br/>68001037232, 68001037233, 68001038928, 68001038936, 68001039077,<br/>68001039078, 68001039179, 68001039180, 68001042237, 68001044226,<br/>68001044327, 68001044432, 68001046836, 68001046837, 68001048706,<br/>68001048807, 68001050454, 68084007511, 68084007521, 68084017701,<br/>68084017701, 68084017701, 68084017711, 68084017711, 68084017711,<br/>68084017801, 68084017801, 68084017801, 68084017811, 68084017811,<br/>68084017811, 68084022901, 68084022901, 68084022911, 68084022911,<br/>68084032511, 68084032521, 68084044901, 68084044901, 68084044911,<br/>68084044911, 68084045001, 68084045001, 68084045011, 68084045011,<br/>68084045101, 68084045101, 68084045111, 68084045111, 68084058701,<br/>68084058701, 68084058701, 68084058711, 68084058711, 68084058711,<br/>68084058801, 68084058801, 68084058801, 68084058811, 68084058811,<br/>68084058811, 68084079501, 68084079501, 68084079501, 68084079511,<br/>68084079511, 68084079511, 68084080101, 68084080101, 68084080101,</p> |
|----------------------------------------------------------------------------------------------------------------------------------------------------------------------------------------------------------------------------------------------------------------------------------------------------------------------------------------------------------------------------------------------------------------------------------------------------------------------------------------------------------------------------------------------------------------------------------------------------------------------------------------------------------------------------------------------------------------------------------------------------------------------------------------------------------------------------------------------------------------------------------------------------------------------------------------------------------------------------------------------------------------------------------------------------------------------------------------------------------------------------------------------------------------------------------------------------------------------------------------------------------------------------------------------------------------------------------------------------------------------------------------------------------------------------------------------------------------------------------------------------------------------------------------------------------------------------------------------------------------------------------------------------------------------------------------------------------------------------------------------------------------------------------------------------------------------------------------------------------------------------------------------------------------------------------------------------------------------------------------------------------------------------------------------------------------------------------------------------------------------------------------------------------------------------------------------------------------------------------------------------------------------------------------------------------------------------------------------------------------------------------------------------------------------------------------------------------------------------------------------------------------------------------------------------------------------------------------------------------------------------------------------------------------------------------------------------------------------------------------------------------------------------------------------------------------------------------------------------------------------------------------------------------------------------------------------------------------------------------------------------------------------------------------------------------------------------------------------------------------------------------------------------------------------------------------------------------------------------------------------------------------------------------------------------------------------------------------------------------------------------------------------------------------------------------------------------------------------------------------------------------------------------------------------------------------------------------------------------------------------------------------------------------------------------------------------------------------------------------------------------------------------------------------------------------------------------------------------------------------------------------------------------------------------------------------------------------------------------------------------------------------------------------------------------------------------------------------------------------------------------------------------------------------------------------------------------------------------------------------------------------------------------------------------------------------------------------------------------------------------------------------------------------------------------------------------------------|

68084080111, 68084080111, 68084080111, 68084087925, 68084087925,  
68084087995, 68084087995, 68084090711, 68084090711, 68084090711,  
68084090721, 68084090721, 68084090721, 68084091525, 68084091525,  
68084091595, 68084091595, 68084091825, 68084091825, 68084091825,  
68084091895, 68084091895, 68084091895, 68084092125, 68084092125,  
68084092195, 68084092195, 68084095625, 68084095625, 68084095695,  
68084095695, 68115063200, 68115081730, 68115081730, 68152010900,  
68258903601, 68258905201, 68258905201, 68258905201, 68258907301,  
68258907301, 68258907301, 68258909901, 68258909901, 68258910301,  
68382000301, 68382000301, 68382000305, 68382000305, 68382011901,  
68382011901, 68382012001, 68382012001, 68382013001, 68382013001,  
68382013001, 68382013005, 68382013005, 68382013005, 68382013010,  
68382013010, 68382013010, 68382013019, 68382013019, 68382013019,  
68382013101, 68382013101, 68382013101, 68382013105, 68382013105,  
68382013105, 68382013110, 68382013110, 68382013110, 68382052001,  
68382052001, 68382075167, 68382075196, 68382075267, 68382075296,  
68382075367, 68382075396, 68382075467, 68382075496, 68382075567,  
68382075596, 68382075696, 68382077501, 68382099701, 68382099710,  
68462050201, 68462050201, 68462068201, 68462068201, 68462068301,  
68462068301, 68462068401, 68462068401, 68462068501, 68462068501,  
68462068601, 68462068601, 68462068701, 68462068701, 68462079201,  
68682000310, 68727090001, 68727090003, 68817013450, 68992301001,  
68992301001, 68992301003, 68992301003, 68992304001, 68992304001,  
68992304003, 68992304003, 68992307501, 68992307501, 68992307503,  
68992307503, 69076091302, 69076091325, 69097028537, 69097051607,  
69097051707, 69097080540, 69097090567, 69097094808, 69097094903,  
69238107601, 69238107601, 69238125001, 69238142301, 69238142306,  
69238159403, 69238159403, 69238159406, 69238159406, 69238159502,  
69238159502, 69238159502, 69448000105, 69448000211, 69448000338,  
69448000512, 69448000531, 69448000533, 69448000534, 69448000538,  
69452015320, 69452015320, 69452015420, 69452015420, 69452015520,  
69452015520, 69623016035, 69918072001, 69918072002, 69918072010,  
70020191001, 70020191002, 70020191101, 70020191102, 70114010101,  
70114010101, 70121123601, 70121123801, 70121123901, 70121124001,  
70121124401, 70121124407, 70121148202, 70121148301, 70121148307,  
70121163001, 70121163101, 70121164401, 70121165801, 70121165806,  
70121166801, 70360000102, 70377001022, 70377001122, 70377001222,  
70377001322, 70377001411, 70377001411, 70377001511, 70377001511,  
70377001611, 70377001611, 70436017223, 70436017223, 70436017223,  
70436017323, 70436017323, 70436017323, 70457982601, 70457982601,  
70457982602, 70457982602, 70457982603, 70457982603, 70700017422,  
70700017522, 70700017622, 70700018622, 70700018623, 70700018722,  
70700018723, 70700018822, 70700018922, 70700027722, 70700027897,  
70710115703, 70710115703, 70710115803, 70710115803, 70710152401,  
70710152509, 70710161001, 70710161006, 70710172601, 70710172608,  
70748012906, 70748012906, 70748013006, 70748013006, 70748018601,  
70748018601, 70748018601, 70748018602, 70748018602, 70748018602,  
70748021716, 70748021716, 70748021716, 70748021816, 70748021816,  
70748021816, 70748021901, 70748021901, 70748022001, 70748022001,  
70748022101, 70748022101, 70748026201, 70748026201, 70748026201,  
70748026202, 70748026202, 70748026202, 70756081560, 70756081622,  
70860020005, 70860020017, 70860020050, 70860020110, 70860020120,  
70860020650, 70860020651, 70860021210, 70860021461, 70860021610,  
70860021641, 70860021710, 70860021803, 70860021805, 70860021810,  
70860021920, 71052004810, 71052005801, 71052005801, 71052005802,  
71052005802, 71052020201, 71052020201, 71052020205, 71052020205,  
71052020225, 71052020225, 71052021203, 71052021205, 71052022310,  
71052026010, 71052026010, 71052026025, 71052026025, 71052031700,  
71052031700, 71052031700, 71052042310, 71052042310, 71052042325,  
71052042325, 71052050701, 71052050750, 71052064401, 71052064405,  
71266641202, 71266800501, 71266800502, 71266800601, 71266800605,  
71288010005, 71288010015, 71288010045, 71288010051, 71288010110,

|                                                                                                                                                                                                                                                                                                                                                                                                                                                                                                                                                                                                                                                                                                                                                                                                                                                                                                                                                                                                                                                                                                                                                                                                                                                                                                                                                                                                                                                                                                                                                                                                                                                                                                                                                                                                                                                                                                                                                                                                                                                                                                                                                                                                                                                                                                                    |
|--------------------------------------------------------------------------------------------------------------------------------------------------------------------------------------------------------------------------------------------------------------------------------------------------------------------------------------------------------------------------------------------------------------------------------------------------------------------------------------------------------------------------------------------------------------------------------------------------------------------------------------------------------------------------------------------------------------------------------------------------------------------------------------------------------------------------------------------------------------------------------------------------------------------------------------------------------------------------------------------------------------------------------------------------------------------------------------------------------------------------------------------------------------------------------------------------------------------------------------------------------------------------------------------------------------------------------------------------------------------------------------------------------------------------------------------------------------------------------------------------------------------------------------------------------------------------------------------------------------------------------------------------------------------------------------------------------------------------------------------------------------------------------------------------------------------------------------------------------------------------------------------------------------------------------------------------------------------------------------------------------------------------------------------------------------------------------------------------------------------------------------------------------------------------------------------------------------------------------------------------------------------------------------------------------------------|
| 71288010120, 71288011110, 71288011290, 71288011530, 71288011610,<br>71288011611, 71288012430, 71288012690, 71288012820, 71288012902,<br>71288014995, 71288014996, 71288015395, 71288080320, 71288080320,<br>71288080320, 71288080321, 71288080321, 71288080321, 71449009135,<br>71449009143, 71449009144, 71610003353, 71610003353, 71610003353,<br>71610003360, 71610003360, 71610003360, 71610003370, 71610003370,<br>71610003370, 71610003375, 71610003375, 71610003375, 71610003380,<br>71610003380, 71610003380, 71610003390, 71610003390, 71610003390,<br>71610003392, 71610003392, 71610003392, 71610003394, 71610003394,<br>71610003394, 71610003398, 71610003398, 71610003398, 71610012409,<br>71610012409, 71610030660, 71610030660, 71837584301, 71837584305,<br>72171050101, 72171050501, 72205000660, 72205000792, 72205003101,<br>72205003601, 72205004501, 72205004601, 72205006101, 72205006201,<br>72205006301, 72266010801, 72266012501, 72266012510, 72266012601,<br>72266012610, 72266012801, 72266014401, 72266016101, 72266016201,<br>72485020101, 72485020460, 72485020512, 72485021001, 72485021008,<br>72485021401, 72485021504, 72485021608, 72493010140, 72493010303,<br>72572076001, 72572076001, 72572076101, 72572076101, 72579001102,<br>72603010101, 72603010401, 72603010701, 72603030101, 72603032601,<br>72606055401, 72606055501, 72606055801, 72606055901, 72606055902,<br>72611078001, 72611078001, 72611078001, 72611078001, 72611078502,<br>72611078502, 72611078502, 72611078502, 72694095401, 72789012930,<br>72789012930, 72893000101, 72893000501, 73090042001, 73090042101,<br>73377008401, 73536050001, 73536050001, 73604091401, 73604091404,<br>73657002001, 75834013205, 75834013214, 75834014205, 75834014214,<br>75834014305, 75834014314, 75834014405, 75834014414, 75834014505,<br>75834014514, 75834014605, 75834019001, 75839020201, 75839020201,<br>75839020205, 75839020205, 75839021400, 75987011110, 75987011111,<br>76075010101, 76075010201, 76075010301, 76310002201, 76310002201,<br>76336008060, 76388063525, 76388063550, 76388071325, 76388088025,<br>78206014701, 78206014799, 78206014801, 78206014899, 78206016201,<br>78206016201, 78206016299, 78206016299, 79672082502, 79672082602,<br>80803015350, 80803015350, 81561041301, 81561041305 |
|--------------------------------------------------------------------------------------------------------------------------------------------------------------------------------------------------------------------------------------------------------------------------------------------------------------------------------------------------------------------------------------------------------------------------------------------------------------------------------------------------------------------------------------------------------------------------------------------------------------------------------------------------------------------------------------------------------------------------------------------------------------------------------------------------------------------------------------------------------------------------------------------------------------------------------------------------------------------------------------------------------------------------------------------------------------------------------------------------------------------------------------------------------------------------------------------------------------------------------------------------------------------------------------------------------------------------------------------------------------------------------------------------------------------------------------------------------------------------------------------------------------------------------------------------------------------------------------------------------------------------------------------------------------------------------------------------------------------------------------------------------------------------------------------------------------------------------------------------------------------------------------------------------------------------------------------------------------------------------------------------------------------------------------------------------------------------------------------------------------------------------------------------------------------------------------------------------------------------------------------------------------------------------------------------------------------|
