# Supplementary material for: Hospitalization Following Outpatient Diagnosis of Respiratory Syncytial Virus in Adults
Source: PubMed Central journal article supplement — JAMA Netw Open. 2024 Nov 19;7(11):e2446010. doi: 10.1001/jamanetworkopen.2024.46010 (PMC11577139; doi:10.1001/jamanetworkopen.2024.46010), 2024-11-19
Supplement: jamanetwopen-e2446010-s002.pdf [file jamanetwopen-e2446010-s002.pdf]

## Data Sharing Statement

Landi. Hospitalization Following Outpatient Diagnosis of Respiratory Syncytial Virus in Adults. *JAMA Netw Open*. Published November 19, 2024. doi:10.1001/jamanetworkopen.2024.46010

### Data

**Data available:** No
